# Supplementary material for: Impact of a High-Fat Diet on the Metabolomics Profile of 129S6 and C57BL6 Mouse Strains
Source: MDPI journal article supplement (doi:10.3390/ijms231911682), 2022-10-02

# Supplementary

Maria Piirsalu, Egon Taalberg, Mohan Jayaram, Kersti Lilleväli, Mihkel Zilmer and Eero Vasar

## “Impact of a high-fat diet on the metabolomics profile of 129Sv and Bl6 mouse strains”

### Supplementary Table S1

Two-way ANOVA [Diet (control diet or high-fat diet) x Strain (Bl6 or 129Sv)] summary table of high-fat diet (HFD)-induced changes in metabolite levels (log2 values. Mean  $\pm$  SEM) and their ratios in Bl6 and 129Sv strain. Bonferroni post-hoc test was used for multiple comparisons. \* Statistically significant difference between control and HFD in Bl6 or 129Sv groups; <sup>+</sup> Statistically significant difference between control diet groups. <sup>@</sup> Statistically significant difference between HFD groups. \*  $p \leq 0.05$ ; \*\*  $p \leq 0.01$ ; \*\*\*  $p \leq 0.001$ ; \*\*\*\*  $p \leq 0.0001$

|                                      | Bl6                        |                   | 129Sv                       |                   | Two-way ANOVA                   |                        |                            |
|--------------------------------------|----------------------------|-------------------|-----------------------------|-------------------|---------------------------------|------------------------|----------------------------|
|                                      | Control diet<br>Mean ± SEM | HFD<br>Mean ± SEM | Control diet<br>Mean ± SEM  | HFD<br>Mean ± SEM |                                 |                        |                            |
|                                      |                            |                   |                             |                   |                                 | <i>F</i>               | <i>p</i>                   |
| Acylcarnitines                       |                            |                   |                             |                   |                                 |                        |                            |
| Carnitine (C0)                       | 4.50 ± 0.07                | 3.35 ± 0.09****   | 4.56 ± 0.10                 | 3.02 ± 0.09****   | Diet<br>Strain<br>Diet X Strain | 226.1<br>2.14<br>4.59  | <0.0001<br>0.15<br>0.04    |
| Acetylcarnitine (C2)                 | 3.48 ± 0.09                | 2.13 ± 0.112****  | 4.25 ± 0.18 <sup>++</sup>   | 2.17 ± 0.20****   | Diet<br>Strain<br>Diet X Strain | 118.9<br>6.52<br>5.51  | <0.0001<br>0.01<br>0.02    |
| Propionylcarnitine (C3)              | -0.53 ± 0.06               | -0.73 ± 0.05      | -0.20 ± 0.05 <sup>+++</sup> | -0.57 ± 0.05****  | Diet<br>Strain<br>Diet X Strain | 28.76<br>21.65<br>2.31 | <0.0001<br><0.0001<br>0.14 |
| Hydroxybutyryl-<br>carnitine (C3-DC) | -1.83 ± 0.08               | -1.82 ± 0.05      | -1.60 ± 0.08                | -1.75 ± 0.06      | Diet<br>Strain                  | 1.07<br>4.54           | 0.31<br>0.04               |

|                                                        |                  |                        |                        |                         |                      |        |         |
|--------------------------------------------------------|------------------|------------------------|------------------------|-------------------------|----------------------|--------|---------|
|                                                        |                  |                        |                        |                         | <b>Diet X Strain</b> | 1.32   | 0.26    |
| Hydroxypropionyl-carnitine (C3-OH)                     | $-2.22 \pm 0.04$ | $-2.25 \pm 0.06$       | $-2.12 \pm 0.05$       | $-2.31 \pm 0.09$        | <b>Diet</b>          | 3.07   | 0.09    |
|                                                        |                  |                        |                        |                         | <b>Strain</b>        | 0.13   | 0.72    |
|                                                        |                  |                        |                        |                         | <b>Diet X Strain</b> | 1.81   | 0.19    |
| Butyryl- and isobutyrylcarnitine (C4-)                 | $-1.05 \pm 0.09$ | $-1.52 \pm 0.05^{***}$ | $-0.59 \pm 0.09^{+++}$ | $-1.48 \pm 0.04^{****}$ | <b>Diet</b>          | 86.77  | <0.0001 |
|                                                        |                  |                        |                        |                         | <b>Strain</b>        | 12.06  | 0.001   |
|                                                        |                  |                        |                        |                         | <b>Diet X Strain</b> | 8.18   | 0.006   |
| Propenoylcarnitine (C3:1)                              | $-2.43 \pm 0.06$ | $-2.47 \pm 0.07$       | $-2.24 \pm 0.06$       | $-2.38 \pm 0.08$        | <b>Diet</b>          | 1.74   | 0.19    |
|                                                        |                  |                        |                        |                         | <b>Strain</b>        | 4.11   | 0.05    |
|                                                        |                  |                        |                        |                         | <b>Diet X Strain</b> | 0.49   | 0.49    |
| Butenoylcarnitine (C4:1)                               | $-1.76 \pm 0.05$ | $-1.89 \pm 0.07$       | $-1.58 \pm 0.05$       | $-1.92 \pm 0.07^{**}$   | <b>Diet</b>          | 13.95  | 0.0005  |
|                                                        |                  |                        |                        |                         | <b>Strain</b>        | 1.41   | 0.24    |
|                                                        |                  |                        |                        |                         | <b>Diet X Strain</b> | 2.81   | 0.10    |
| Isovalerylcarnitine and 2-methylbutyrylcarnitine (C5-) | $-1.33 \pm 0.05$ | $-1.33 \pm 0.06$       | $-1.12 \pm 0.05$       | $-1.25 \pm 0.08$        | <b>Diet</b>          | 1.14   | 0.29    |
|                                                        |                  |                        |                        |                         | <b>Strain</b>        | 5.52   | 0.02    |
|                                                        |                  |                        |                        |                         | <b>Diet X Strain</b> | 1.16   | 0.29    |
| Methylglutarylcarnitine (C5-M-DC)                      | $-3.18 \pm 0.05$ | $-3.21 \pm 0.07$       | $-3.08 \pm 0.11$       | $-3.14 \pm 0.09$        | <b>Diet</b>          | 0.38   | 0.54    |
|                                                        |                  |                        |                        |                         | <b>Strain</b>        | 1.07   | 0.31    |
|                                                        |                  |                        |                        |                         | <b>Diet X Strain</b> | 0.03   | 0.87    |
| Glutarylcarnitine (C5-DC)                              | $-3.13 \pm 0.08$ | $-3.19 \pm 0.05$       | $-2.98 \pm 0.08$       | $-3.15 \pm 0.06$        | <b>Diet</b>          | 2.57   | 0.12    |
|                                                        |                  |                        |                        |                         | <b>Strain</b>        | 1.84   | 0.18    |
|                                                        |                  |                        |                        |                         | <b>Diet X Strain</b> | 0.59   | 0.44    |
| Hydroxyvaleryl-carnitine (C5-OH)                       | $-2.89 \pm 0.07$ | $-2.98 \pm 0.07$       | $-2.94 \pm 0.05$       | $-3.02 \pm 0.08$        | <b>Diet</b>          | 1.46   | 0.23    |
|                                                        |                  |                        |                        |                         | <b>Strain</b>        | 0.53   | 0.47    |
|                                                        |                  |                        |                        |                         | <b>Diet X Strain</b> | 0.009  | 0.92    |
| Tiglylcarnitine (C5:1)                                 | $-2.81 \pm 0.05$ | $-2.84 \pm 0.05$       | $-2.78 \pm 0.07$       | $-2.87 \pm 0.07$        | <b>Diet</b>          | 0.86   | 0.36    |
|                                                        |                  |                        |                        |                         | <b>Strain</b>        | 0.0005 | 0.98    |
|                                                        |                  |                        |                        |                         | <b>Diet X Strain</b> | 0.33   | 0.56    |
| Glutaconylcarnitine (C5:1-DC)                          | $-2.58 \pm 0.07$ | $-2.58 \pm 0.05$       | $-2.50 \pm 0.07$       | $-2.56 \pm 0.07$        | <b>Diet</b>          | 0.25   | 0.62    |
|                                                        |                  |                        |                        |                         | <b>Strain</b>        | 0.67   | 0.42    |
|                                                        |                  |                        |                        |                         | <b>Diet X Strain</b> | 0.22   | 0.64    |
| Hexanoylcarnitine (C6)                                 | $-4.45 \pm 0.04$ | $-4.58 \pm 0.06$       | $-4.48 \pm 0.07$       | $-4.52 \pm 0.04$        | <b>Diet</b>          | 2.37   | 0.13    |
|                                                        |                  |                        |                        |                         | <b>Strain</b>        | 0.05   | 0.83    |
|                                                        |                  |                        |                        |                         | <b>Diet X Strain</b> | 0.78   | 0.38    |

|                                |              |              |                            |                |                                                      |                       |                         |
|--------------------------------|--------------|--------------|----------------------------|----------------|------------------------------------------------------|-----------------------|-------------------------|
| Hexenoylcarnitine (C6:1)       | -5.14 ± 0.06 | -5.12 ± 0.04 | -5.12 ± 0.06               | -5.14 ± 0.04   | <b>Diet</b><br><b>Strain</b><br><b>Diet X Strain</b> | 0.01<br>0.003<br>0.15 | 0.92<br>0.96<br>0.70    |
| Pimelylcarnitine (C7-DC)       | -3.86 ± 0.06 | -3.72 ± 0.08 | -3.65 ± 0.08               | -3.63 ± 0.04   | <b>Diet</b><br><b>Strain</b><br><b>Diet X Strain</b> | 1.36<br>5.15<br>0.86  | 0.25<br>0.03<br>0.36    |
| Octanoylcarnitine (C8)         | -2.55 ± 0.06 | -2.61 ± 0.05 | -2.53 ± 0.06               | -2.45 ± 0.05   | <b>Diet</b><br><b>Strain</b><br><b>Diet X Strain</b> | 0.04<br>2.94<br>1.64  | 0.85<br>0.09<br>0.21    |
| Nonanoylcarnitine (C9)         | -3.27 ± 0.12 | -3.09 ± 0.08 | -3.07 ± 0.03               | -3.14 ± 0.07   | <b>Diet</b><br><b>Strain</b><br><b>Diet X Strain</b> | 0.51<br>0.86<br>2.56  | 0.48<br>0.36<br>0.12    |
| Decanoylcarnitine (C10)        | -2.35 ± 0.10 | -2.34 ± 0.07 | -2.34 ± 0.06               | -2.42 ± 0.09   | <b>Diet</b><br><b>Strain</b><br><b>Diet X Strain</b> | 0.15<br>0.17<br>0.36  | 0.70<br>0.68<br>0.55    |
| Decenoylcarnitine (C10:1)      | -3.65 ± 0.07 | -3.58 ± 0.07 | -3.50 ± 0.06               | -3.58 ± 0.04   | <b>Diet</b><br><b>Strain</b><br><b>Diet X Strain</b> | 0.002<br>1.53<br>1.69 | 0.96<br>0.22<br>0.20    |
| Decadienyl-carnitine (C10:2)   | -3.40 ± 0.05 | -3.31 ± 0.07 | -3.25 ± 0.06               | 3.45 ± 0.08    | <b>Diet</b><br><b>Strain</b><br><b>Diet X Strain</b> | 0.66<br>0.002<br>5.09 | 0.42<br>0.96<br>0.03    |
| Dodecanoyl-carnitine (C12)     | -3.64 ± 0.05 | -3.67 ± 0.08 | -3.24 ± 0.12 <sup>++</sup> | -3.65 ± 0.05** | <b>Diet</b><br><b>Strain</b><br><b>Diet X Strain</b> | 7.20<br>6.61<br>5.62  | 0.01<br>0.01<br>0.02    |
| Dodecanedioyl-carnitine C12-DC | -1.88 ± 0.07 | -1.88 ± 0.07 | -1.89 ± 0.04               | -2.00 ± 0.05   | <b>Diet</b><br><b>Strain</b><br><b>Diet X Strain</b> | 0.87<br>1.08<br>0.81  | 0.36<br>0.30<br>0.37    |
| Dodecenoyl-carnitine (C12:1)   | -3.50 ± 0.08 | -3.69 ± 0.08 | -3.14 ± 0.11 <sup>+</sup>  | -3.53 ± 0.08*  | <b>Diet</b><br><b>Strain</b><br><b>Diet X Strain</b> | 10.94<br>8.93<br>1.33 | 0.002<br>0.005<br>0.25  |
| Tetradecanoyl-carnitine (C14)  | -3.54 ± 0.08 | -3.89 ± 0.08 | -3.01 ± 0.22 <sup>+</sup>  | -3.65 ± 0.11*  | <b>Diet</b><br><b>Strain</b><br><b>Diet X Strain</b> | 12.94<br>8.04<br>1.13 | 0.0008<br>0.007<br>0.29 |
|                                |              |              |                            |                | <b>Diet</b>                                          | 5.18                  | 0.03                    |

|                                           |              |                |                            |                  |                      |       |         |
|-------------------------------------------|--------------|----------------|----------------------------|------------------|----------------------|-------|---------|
| Tetradecenoyl-carnitine (C14:1)           | -3.96 ± 0.17 | -4.23 ± 0.14   | -3.53 ± 0.19               | -3.98 ± 0.10     | <b>Strain</b>        | 4.53  | 0.04    |
|                                           |              |                |                            |                  | <b>Diet X Strain</b> | 0.29  | 0.59    |
| Hydroxytetradecenoylcarnitine (C14:1-OH)  | -5.07 ± 0.10 | -4.98 ± 0.09   | -4.65 ± 0.14               | -4.96 ± 0.11     | <b>Diet</b>          | 0.97  | 0.33    |
|                                           |              |                |                            |                  | <b>Strain</b>        | 3.64  | 0.06    |
|                                           |              |                |                            |                  | <b>Diet X Strain</b> | 3.26  | 0.08    |
| Tetradecadienyl-carnitine (C14:2)         | -4.85 ± 0.10 | -5.06 ± 0.15   | -4.37 ± 0.13 <sup>+</sup>  | -5.17 ± 0.05**** | <b>Diet</b>          | 19.03 | <0.0001 |
|                                           |              |                |                            |                  | <b>Strain</b>        | 2.54  | 0.12    |
|                                           |              |                |                            |                  | <b>Diet X Strain</b> | 6.74  | 0.01    |
| Hydroxytetradecadienylcarnitine C14:2-OH  | -6.86 ± 0.07 | -6.95 ± 0.09   | -6.70 ± 0.09               | -6.80 ± 0.11     | <b>Diet</b>          | 1.01  | 0.32    |
|                                           |              |                |                            |                  | <b>Strain</b>        | 2.91  | 0.10    |
|                                           |              |                |                            |                  | <b>Diet X Strain</b> | 0.001 | 0.97    |
| Hexadecanoyl-carnitine (C16)              | -2.71 ± 0.11 | -2.92 ± 0.10   | -1.84 ± 0.26 <sup>++</sup> | -2.45 ± 0.11     | <b>Diet</b>          | 6.09  | 0.02    |
|                                           |              |                |                            |                  | <b>Strain</b>        | 16.48 | 0.0002  |
|                                           |              |                |                            |                  | <b>Diet X Strain</b> | 1.46  | 0.23    |
| Hydroxyhexadecanoylcarnitine (C16-OH)     | -4.50 ± 0.13 | -4.54 ± 0.06   | -4.27 ± 0.10               | -4.50 ± 0.10     | <b>Diet</b>          | 1.81  | 0.19    |
|                                           |              |                |                            |                  | <b>Strain</b>        | 1.88  | 0.18    |
|                                           |              |                |                            |                  | <b>Diet X Strain</b> | 0.84  | 0.37    |
| Hexadecenoyl-carnitine (C16:1)            | -3.94 ± 0.09 | -4.37 ± 0.11   | -3.43 ± 0.22               | -4.27 ± 0.11**   | <b>Diet</b>          | 18.11 | 0.0001  |
|                                           |              |                |                            |                  | <b>Strain</b>        | 4.12  | 0.05    |
|                                           |              |                |                            |                  | <b>Diet X Strain</b> | 1.81  | 0.19    |
| Hydroxyhexadecenoylcarnitine (C16:1-OH)   | -6.75 ± 0.10 | -6.70 ± 0.22   | -6.53 ± 0.11               | -6.70 ± 0.12     | <b>Diet</b>          | 0.19  | 0.66    |
|                                           |              |                |                            |                  | <b>Strain</b>        | 0.72  | 0.40    |
|                                           |              |                |                            |                  | <b>Diet X Strain</b> | 0.66  | 0.42    |
| Hexadecadienyl-carnitine C16:2            | -4.31 ± 0.05 | -4.45 ± 0.04   | -4.30 ± 0.08               | -4.55 ± 0.05*    | <b>Diet</b>          | 10.92 | 0.002   |
|                                           |              |                |                            |                  | <b>Strain</b>        | 0.60  | 0.44    |
|                                           |              |                |                            |                  | <b>Diet X Strain</b> | 0.79  | 0.38    |
| Hydroxyhexadecadienylcarnitine (C16:2-OH) | -4.24 ± 0.10 | -4.30 ± 0.06   | -4.11 ± 0.08               | -4.57 ± 0.09**   | <b>Diet</b>          | 9.73  | 0.003   |
|                                           |              |                |                            |                  | <b>Strain</b>        | 0.67  | 0.42    |
|                                           |              |                |                            |                  | <b>Diet X Strain</b> | 5.63  | 0.02    |
| Octadecanoylcarnitine (C18)               | -4.10 ± 0.08 | -3.57 ± 0.05** | -3.72 ± 0.14               | -3.09 ± 0.12***@ | <b>Diet</b>          | 31.10 | <0.0001 |
|                                           |              |                |                            |                  | <b>Strain</b>        | 16.85 | 0.0002  |
|                                           |              |                |                            |                  | <b>Diet X Strain</b> | 0.28  | 0.60    |
| Octadecenoyl-carnitine (C18:1)            | -3.58 ± 0.13 | -3.57 ± 0.11   | -3.22 ± 0.19               | -3.10 ± 0.17     | <b>Diet</b>          | 0.19  | 0.66    |
|                                           |              |                |                            |                  | <b>Strain</b>        | 7.55  | 0.009   |

|                                                 |              |                |                           |                  |                      |       |         |
|-------------------------------------------------|--------------|----------------|---------------------------|------------------|----------------------|-------|---------|
|                                                 |              |                |                           |                  | <b>Diet X Strain</b> | 0.15  | 0.71    |
| Hydroxyocta-<br>decenoylcarnitine<br>(C18:1-OH) | -4.46 ± 0.08 | -4.56 ± 0.08   | -4.10 ± 0.06 <sup>+</sup> | -4.53 ± 0.12**   | <b>Diet</b>          | 8.63  | 0.005   |
|                                                 |              |                |                           |                  | <b>Strain</b>        | 4.79  | 0.03    |
|                                                 |              |                |                           |                  | <b>Diet X Strain</b> | 3.48  | 0.07    |
| Octadecadienyl-carnitine<br>(C18:2)             | -5.18 ± 0.11 | -5.95 ± 0.10** | -4.52 ± 0.21 <sup>+</sup> | -5.70 ± 0.12**** | <b>Diet</b>          | 41.68 | <0.0001 |
|                                                 |              |                |                           |                  | <b>Strain</b>        | 9.23  | 0.004   |
|                                                 |              |                |                           |                  | <b>Diet X Strain</b> | 1.82  | 0.18    |
| <b>Amino Acids</b>                              |              |                |                           |                  |                      |       |         |
| Alanine (Ala)                                   | 8.15 ± 0.05  | 8.27 ± 0.11    | 8.21 ± 0.08               | 7.97 ± 0.15      | <b>Diet</b>          | 0.38  | 0.54    |
|                                                 |              |                |                           |                  | <b>Strain</b>        | 1.31  | 0.26    |
|                                                 |              |                |                           |                  | <b>Diet X Strain</b> | 2.98  | 0.09    |
| Arginine (Arg)                                  | 6.20 ± 0.14  | 6.16 ± 0.16    | 6.82 ± 0.15 <sup>+</sup>  | 6.28 ± 0.15      | <b>Diet</b>          | 3.91  | 0.05    |
|                                                 |              |                |                           |                  | <b>Strain</b>        | 6.14  | 0.02    |
|                                                 |              |                |                           |                  | <b>Diet X Strain</b> | 2.81  | 0.10    |
| Asparagine (Asn)                                | 5.12 ± 0.14  | 5.20 ± 0.14    | 5.36 ± 0.09               | 5.14 ± 0.17      | <b>Diet</b>          | 0.26  | 0.61    |
|                                                 |              |                |                           |                  | <b>Strain</b>        | 0.41  | 0.53    |
|                                                 |              |                |                           |                  | <b>Diet X Strain</b> | 1.16  | 0.29    |
| Aspartate (Asp)                                 | 5.66 ± 0.12  | 5.24 ± 0.22    | 5.99 ± 0.19               | 5.69 ± 0.14      | <b>Diet</b>          | 3.78  | 0.06    |
|                                                 |              |                |                           |                  | <b>Strain</b>        | 4.50  | 0.04    |
|                                                 |              |                |                           |                  | <b>Diet X Strain</b> | 0.12  | 0.73    |
| Citrulline (Cit)                                | 5.41 ± 0.06  | 5.74 ± 0.09*   | 5.73 ± 0.09 <sup>+</sup>  | 5.67 ± 0.09      | <b>Diet</b>          | 2.62  | 0.11    |
|                                                 |              |                |                           |                  | <b>Strain</b>        | 2.40  | 0.13    |
|                                                 |              |                |                           |                  | <b>Diet X Strain</b> | 5.78  | 0.02    |
| Glutamine (Gln)                                 | 9.37 ± 0.06  | 9.12 ± 0.07    | 9.04 ± 0.08 <sup>+</sup>  | 9.12 ± 0.12      | <b>Diet</b>          | 1.00  | 0.32    |
|                                                 |              |                |                           |                  | <b>Strain</b>        | 3.64  | 0.06    |
|                                                 |              |                |                           |                  | <b>Diet X Strain</b> | 3.86  | 0.06    |
| Glutamate (Glu)                                 | 7.26 ± 0.26  | 7.09 ± 0.21    | 7.37 ± 0.15               | 7.50 ± 0.16      | <b>Diet</b>          | 0.01  | 0.93    |
|                                                 |              |                |                           |                  | <b>Strain</b>        | 1.73  | 0.19    |
|                                                 |              |                |                           |                  | <b>Diet X Strain</b> | 0.59  | 0.45    |
| Glycine (Gly)                                   | 7.68 ± 0.07  | 7.41 ± 0.10    | 7.95 ± 0.09               | 7.20 ± 0.05****  | <b>Diet</b>          | 40.05 | <0.0001 |
|                                                 |              |                |                           |                  | <b>Strain</b>        | 0.19  | 0.67    |
|                                                 |              |                |                           |                  | <b>Diet X Strain</b> | 8.84  | 0.005   |

|                     |             |             |                            |                            |                      |       |         |
|---------------------|-------------|-------------|----------------------------|----------------------------|----------------------|-------|---------|
| Histidine (His)     | 5.74 ± 0.05 | 6.04 ± 0.09 | 5.96 ± 0.04                | 6.09 ± 0.10                | <b>Diet</b>          | 8.33  | 0.006   |
|                     |             |             |                            |                            | <b>Strain</b>        | 3.34  | 0.07    |
|                     |             |             |                            |                            | <b>Diet X Strain</b> | 1.08  | 0.30    |
| Isoleucine (Ile)    | 6.22 ± 0.10 | 6.62 ± 0.19 | 6.99 ± 0.08 <sup>++</sup>  | 7.48 ± 0.15 <sup>@@@</sup> | <b>Diet</b>          | 10.70 | 0.002   |
|                     |             |             |                            |                            | <b>Strain</b>        | 35.75 | <0.0001 |
|                     |             |             |                            |                            | <b>Diet X Strain</b> | 0.12  | 0.73    |
| Leucine (Leu)       | 7.04 ± 0.08 | 7.38 ± 0.15 | 7.68 ± 0.08 <sup>++</sup>  | 8.08 ± 0.14 <sup>@@@</sup> | <b>Diet</b>          | 10.34 | 0.002   |
|                     |             |             |                            |                            | <b>Strain</b>        | 34.63 | <0.0001 |
|                     |             |             |                            |                            | <b>Diet X Strain</b> | 0.08  | 0.77    |
| Lysine (Lys)        | 7.48 ± 0.11 | 7.99 ± 0.16 | 8.38 ± 0.14 <sup>+++</sup> | 8.10 ± 0.15                | <b>Diet</b>          | 0.71  | 0.40    |
|                     |             |             |                            |                            | <b>Strain</b>        | 13.35 | 0.0007  |
|                     |             |             |                            |                            | <b>Diet X Strain</b> | 8.35  | 0.006   |
| Methionine (Met)    | 5.59 ± 0.12 | 5.96 ± 0.20 | 6.31 ± 0.20 <sup>+</sup>   | 6.01 ± 0.21                | <b>Diet</b>          | 0.03  | 0.85    |
|                     |             |             |                            |                            | <b>Strain</b>        | 4.35  | 0.04    |
|                     |             |             |                            |                            | <b>Diet X Strain</b> | 3.21  | 0.08    |
| Ornithine (Orn)     | 5.45 ± 0.12 | 4.93 ± 0.17 | 6.14 ± 0.10 <sup>++</sup>  | 5.70 ± 0.13 <sup>@@</sup>  | <b>Diet</b>          | 13.22 | 0.0007  |
|                     |             |             |                            |                            | <b>Strain</b>        | 30.28 | <0.0001 |
|                     |             |             |                            |                            | <b>Diet X Strain</b> | 0.09  | 0.76    |
| Phenylalanine (Phe) | 5.96 ± 0.07 | 5.82 ± 0.09 | 6.30 ± 0.08                | 6.25 ± 0.11 <sup>@@</sup>  | <b>Diet</b>          | 1.15  | 0.29    |
|                     |             |             |                            |                            | <b>Strain</b>        | 18.85 | <0.0001 |
|                     |             |             |                            |                            | <b>Diet X Strain</b> | 0.26  | 0.61    |
| Proline (Pro)       | 6.41 ± 0.12 | 6.69 ± 0.23 | 6.60 ± 0.13                | 6.61 ± 0.22                | <b>Diet</b>          | 0.67  | 0.42    |
|                     |             |             |                            |                            | <b>Strain</b>        | 0.09  | 0.76    |
|                     |             |             |                            |                            | <b>Diet X Strain</b> | 0.56  | 0.46    |
| Serine (Ser)        | 6.52 ± 0.10 | 6.58 ± 0.14 | 7.11 ± 0.08 <sup>++</sup>  | 6.81 ± 0.13                | <b>Diet</b>          | 1.20  | 0.28    |
|                     |             |             |                            |                            | <b>Strain</b>        | 13.53 | 0.0006  |
|                     |             |             |                            |                            | <b>Diet X Strain</b> | 2.45  | 0.12    |
| Tryptophan (Trp)    | 6.17 ± 0.08 | 5.87 ± 0.08 | 6.42 ± 0.06                | 6.17 ± 0.10                | <b>Diet</b>          | 12.32 | 0.001   |
|                     |             |             |                            |                            | <b>Strain</b>        | 12.54 | 0.0009  |
|                     |             |             |                            |                            | <b>Diet X Strain</b> | 0.11  | 0.75    |
| Tyrosine (Tyr)      | 5.84 ± 0.13 | 5.93 ± 0.14 | 5.93 ± 0.11                | 6.26 ± 0.18                | <b>Diet</b>          | 2.19  | 0.15    |
|                     |             |             |                            |                            | <b>Strain</b>        | 2.19  | 0.15    |
|                     |             |             |                            |                            | <b>Diet X Strain</b> | 0.74  | 0.39    |
| Valine (Val)        |             |             |                            |                            | <b>Diet</b>          | 18.55 | <0.0001 |

|                                          |              |              |                             |                              |                                       |               |                 |
|------------------------------------------|--------------|--------------|-----------------------------|------------------------------|---------------------------------------|---------------|-----------------|
|                                          | 7.41 ± 0.07  | 7.95 ± 0.21  | 8.05 ± 0.09 <sup>+</sup>    | 8.71 ± 0.16 <sup>**@@</sup>  | <b>Strain</b><br><b>Diet X Strain</b> | 25.59<br>0.21 | <0.0001<br>0.65 |
| <b>Biogenic Amines</b>                   |              |              |                             |                              |                                       |               |                 |
| Asymmetric<br>dimethylarginine<br>(ADMA) | -1.32 ± 0.15 | -1.45 ± 0.14 | -1.15 ± 0.17                | -1.15 ± 0.12                 | <b>Diet</b>                           | 0.19          | 0.66            |
|                                          |              |              |                             |                              | <b>Strain</b>                         | 2.26          | 0.14            |
|                                          |              |              |                             |                              | <b>Diet X Strain</b>                  | 0.16          | 0.69            |
| Alpha-Aminoadipic acid<br>(Alpha-AAA)    | 1.73 ± 0.11  | 2.02 ± 0.11  | 1.11 ± 0.07 <sup>++</sup>   | 0.91 ± 0.05 <sup>@@@@</sup>  | <b>Diet</b>                           | 0.15          | 0.70            |
|                                          |              |              |                             |                              | <b>Strain</b>                         | 57.02         | <0.0001         |
|                                          |              |              |                             |                              | <b>Diet X Strain</b>                  | 4.78          | 0.04            |
| Carnosine                                | 2.26 ± 0.08  | 2.17 ± 0.18  | 0.77 ± 0.15 <sup>++++</sup> | 0.79 ± 0.14 <sup>@@@@</sup>  | <b>Diet</b>                           | 0.07          | 0.79            |
|                                          |              |              |                             |                              | <b>Strain</b>                         | 96.09         | <0.0001         |
|                                          |              |              |                             |                              | <b>Diet X Strain</b>                  | 0.16          | 0.69            |
| Creatinine                               | 2.93 ± 0.06  | 2.83 ± 0.06  | 3.06 ± 0.08                 | 2.91 ± 0.08                  | <b>Diet</b>                           | 3.22          | 0.08            |
|                                          |              |              |                             |                              | <b>Strain</b>                         | 2.15          | 0.15            |
|                                          |              |              |                             |                              | <b>Diet X Strain</b>                  | 0.09          | 0.77            |
| Histamine                                | -0.78 ± 0.14 | -0.76 ± 0.08 | -0.60 ± 0.07                | -0.82 ± 0.09                 | <b>Diet</b>                           | 1.11          | 0.30            |
|                                          |              |              |                             |                              | <b>Strain</b>                         | 0.31          | 0.58            |
|                                          |              |              |                             |                              | <b>Diet X Strain</b>                  | 1.46          | 0.23            |
| Putrescine                               | -0.42 ± 0.12 | -0.12 ± 0.14 | -0.83 ± 0.16                | -1.12 ± 0.11 <sup>@@@@</sup> | <b>Diet</b>                           | 0.005         | 0.95            |
|                                          |              |              |                             |                              | <b>Strain</b>                         | 26.63         | <0.0001         |
|                                          |              |              |                             |                              | <b>Diet X Strain</b>                  | 4.66          | 0.04            |
| Serotonin (5-HT)                         | 3.05 ± 0.37  | 3.47 ± 0.36  | 3.11 ± 0.20                 | 3.18 ± 0.19                  | <b>Diet</b>                           | 0.78          | 0.39            |
|                                          |              |              |                             |                              | <b>Strain</b>                         | 0.16          | 0.69            |
|                                          |              |              |                             |                              | <b>Diet X Strain</b>                  | 0.39          | 0.54            |
| Spermidine                               | 0.93 ± 0.10  | 0.93 ± 0.09  | 1.26 ± 0.14                 | 0.83 ± 0.08 <sup>*</sup>     | <b>Diet</b>                           | 4.05          | 0.05            |
|                                          |              |              |                             |                              | <b>Strain</b>                         | 1.32          | 0.26            |
|                                          |              |              |                             |                              | <b>Diet X Strain</b>                  | 4.21          | 0.05            |
| Spermine                                 | -0.47 ± 0.13 | -0.55 ± 0.12 | -0.40 ± 0.12                | -0.50 ± 0.17                 | <b>Diet</b>                           | 0.44          | 0.51            |
|                                          |              |              |                             |                              | <b>Strain</b>                         | 0.19          | 0.67            |
|                                          |              |              |                             |                              | <b>Diet X Strain</b>                  | 0.01          | 0.92            |
|                                          |              |              |                             |                              | <b>Diet</b>                           | 5.79          | 0.02            |

|                                             |              |                  |                             |                    |                      |       |         |
|---------------------------------------------|--------------|------------------|-----------------------------|--------------------|----------------------|-------|---------|
| Trans-4-Hydroxyproline<br>(t4-OH-Pro)       | 3.23 ± 0.08  | 3.46 ± 0.07      | 3.27 ± 0.08                 | 2.69 ± 0.06****@@@ | <b>Strain</b>        | 24.55 | <0.0001 |
|                                             |              |                  |                             |                    | <b>Diet X Strain</b> | 31.77 | <0.0001 |
| Kynurenine                                  | 0.27 ± 0.11  | -0.61 ± 0.15**** | 0.68 ± 0.08                 | -0.05 ± 0.13***@   | <b>Diet</b>          | 46.38 | <0.0001 |
|                                             |              |                  |                             |                    | <b>Strain</b>        | 16.81 | 0.0002  |
|                                             |              |                  |                             |                    | <b>Diet X Strain</b> | 0.42  | 0.52    |
| Methionine sulfoxide<br>(Met-SO)            | -0.04 ± 0.52 | 1.19 ± 0.68      | 1.30 ± 0.28                 | 1.80 ± 0.33        | <b>Diet</b>          | 3.60  | 0.06    |
|                                             |              |                  |                             |                    | <b>Strain</b>        | 4.59  | 0.04    |
|                                             |              |                  |                             |                    | <b>Diet X Strain</b> | 0.62  | 0.44    |
| Nitro-Tyrosine                              | -0.35 ± 0.08 | -0.40 ± 0.13     | -0.09 ± 0.04                | -0.14 ± 0.07       | <b>Diet</b>          | 0.38  | 0.54    |
|                                             |              |                  |                             |                    | <b>Strain</b>        | 8.88  | 0.006   |
|                                             |              |                  |                             |                    | <b>Diet X Strain</b> | 0.00  | 0.98    |
| cis-4-Hydroxyproline<br>(c4-OH-Pro)         | -1.61 ± 0.49 | -1.85 ± 0.32     | -2.29 ± 0.11                | -2.97 ± 0.00       | <b>Diet</b>          | 1.70  | 0.22    |
|                                             |              |                  |                             |                    | <b>Strain</b>        | 6.50  | 0.03    |
|                                             |              |                  |                             |                    | <b>Diet X Strain</b> | 0.40  | 0.54    |
| <b>Glycerophospholipids</b>                 |              |                  |                             |                    |                      |       |         |
| <b><i>Lysophosphatidylcholine acyls</i></b> |              |                  |                             |                    |                      |       |         |
| lysoPC a C14:0                              | 2.81 ± 0.09  | 2.59 ± 0.14      | 2.73 ± 0.12                 | 2.81 ± 0.162       | <b>Diet</b>          | 0.27  | 0.61    |
|                                             |              |                  |                             |                    | <b>Strain</b>        | 0.27  | 0.61    |
|                                             |              |                  |                             |                    | <b>Diet X Strain</b> | 1.15  | 0.29    |
| lysoPC a C16:0                              | 7.08 ± 0.07  | 7.27 ± 0.07      | 7.13 ± 0.06                 | 7.03 ± 0.08        | <b>Diet</b>          | 0.40  | 0.53    |
|                                             |              |                  |                             |                    | <b>Strain</b>        | 1.72  | 0.20    |
|                                             |              |                  |                             |                    | <b>Diet X Strain</b> | 4.43  | 0.04    |
| lysoPC a C16:1                              | 2.45 ± 0.11  | 2.46 ± 0.14      | 1.51 ± 0.10 <sup>++++</sup> | 1.44 ± 0.13@@@     | <b>Diet</b>          | 0.07  | 0.79    |
|                                             |              |                  |                             |                    | <b>Strain</b>        | 65.22 | <0.0001 |
|                                             |              |                  |                             |                    | <b>Diet X Strain</b> | 0.09  | 0.77    |
| lysoPC a C17:0                              | 0.90 ± 0.07  | 0.80 ± 0.06      | 1.53 ± 0.06 <sup>++++</sup> | 1.12 ± 0.09***@    | <b>Diet</b>          | 13.54 | 0.0006  |
|                                             |              |                  |                             |                    | <b>Strain</b>        | 46.48 | <0.0001 |
|                                             |              |                  |                             |                    | <b>Diet X Strain</b> | 5.06  | 0.03    |
| lysoPC a C18:0                              | 5.91 ± 0.08  | 6.56 ± 0.08****  | 6.05 ± 0.05                 | 6.61 ± 0.07****    | <b>Diet</b>          | 72.70 | <0.0001 |
|                                             |              |                  |                             |                    | <b>Strain</b>        | 1.57  | 0.22    |
|                                             |              |                  |                             |                    | <b>Diet X Strain</b> | 0.46  | 0.50    |



|                                           |              |                  |                             |                   |                                                      |                         |                            |
|-------------------------------------------|--------------|------------------|-----------------------------|-------------------|------------------------------------------------------|-------------------------|----------------------------|
| lysoPC a C18:1                            | 5.02 ± 0.10  | 6.36 ± 0.12****  | 4.55 ± 0.08 <sup>+</sup>    | 6.11 ± 0.14****   | <b>Diet</b><br><b>Strain</b><br><b>Diet X Strain</b> | 168.24<br>10.50<br>1.04 | <0.0001<br>0.002<br>0.31   |
| lysoPC a C18:2                            | 6.31 ± 0.08  | 6.79 ± 0.12*     | 6.24 ± 0.06                 | 6.81 ± 0.14**     | <b>Diet</b><br><b>Strain</b><br><b>Diet X Strain</b> | 27.07<br>0.05<br>0.21   | <0.0001<br>0.82<br>0.65    |
| lysoPC a C20:3                            | 2.40 ± 0.16  | 4.13 ± 0.09****  | 1.56 ± 0.09 <sup>++++</sup> | 3.50 ± 0.11****@@ | <b>Diet</b><br><b>Strain</b><br><b>Diet X Strain</b> | 255.48<br>41.19<br>0.91 | <0.0001<br><0.0001<br>0.35 |
| lysoPC a C20:4                            | 4.46 ± 0.10  | 4.67 ± 0.10      | 4.10 ± 0.06                 | 4.59 ± 0.14**     | <b>Diet</b><br><b>Strain</b><br><b>Diet X Strain</b> | 12.08<br>4.61<br>1.85   | 0.001<br>0.04<br>0.18      |
| lysoPC a C24:0                            | -0.09 ± 0.09 | 0.05 ± 0.07      | 0.44 ± 0.05 <sup>++++</sup> | 0.47 ± 0.10@@     | <b>Diet</b><br><b>Strain</b><br><b>Diet X Strain</b> | 1.19<br>38.20<br>0.47   | 0.28<br><0.0001<br>0.49    |
| lysoPC a C26:0                            | -2.54 ± 0.12 | -1.86 ± 0.08**** | -2.50 ± 0.07                | -1.95 ± 0.11***   | <b>Diet</b><br><b>Strain</b><br><b>Diet X Strain</b> | 42.23<br>0.09<br>0.47   | <0.0001<br>0.77<br>0.50    |
| lysoPC a C26:1                            | -1.78 ± 0.14 | -1.38 ± 0.12     | -1.50 ± 0.11                | -1.26 ± 0.14      | <b>Diet</b><br><b>Strain</b><br><b>Diet X Strain</b> | 6.18<br>2.57<br>0.43    | 0.02<br>0.11<br>0.51       |
| lysoPC a C28:0                            | -1.74 ± 0.27 | -1.91 ± 0.09     | -2.02 ± 0.22                | -1.77 ± 0.13      | <b>Diet</b><br><b>Strain</b><br><b>Diet X Strain</b> | 0.05<br>0.14<br>1.23    | 0.82<br>0.71<br>0.27       |
| lysoPC a C28:1                            | -2.24 ± 0.10 | -1.67 ± 0.09***  | -2.33 ± 0.05                | -1.60 ± 0.11****  | <b>Diet</b><br><b>Strain</b><br><b>Diet X Strain</b> | 54.37<br>0.006<br>0.81  | <0.0001<br>0.94<br>0.37    |
| <b><i>Phosphatidylcholine diacyls</i></b> |              |                  |                             |                   |                                                      |                         |                            |
| PC aa C24:0                               | -2.63 ± 0.09 | -2.39 ± 0.14     | -2.60 ± 0.12                | -2.40 ± 0.13      | <b>Diet</b><br><b>Strain</b><br><b>Diet X Strain</b> | 3.30<br>0.01<br>0.03    | 0.08<br>0.92<br>0.86       |
| PC aa C26:0                               | -1.07 ± 0.10 | -0.86 ± 0.07     | -1.09 ± 0.06                | -0.76 ± 0.09*     | <b>Diet</b><br><b>Strain</b>                         | 11.09<br>0.23           | 0.002<br>0.63              |

|             |              |                  |                              |                     |                      |        |         |
|-------------|--------------|------------------|------------------------------|---------------------|----------------------|--------|---------|
|             |              |                  |                              |                     | <b>Diet X Strain</b> | 0.57   | 0.45    |
| PC aa C28:1 | -1.85 ± 0.08 | -1.13 ± 0.07**** | -1.71 ± 0.06                 | -0.78 ± 0.07****@@  | <b>Diet</b>          | 152.02 | <0.0001 |
|             |              |                  |                              |                     | <b>Strain</b>        | 13.89  | 0.0005  |
|             |              |                  |                              |                     | <b>Diet X Strain</b> | 2.44   | 0.13    |
| PC aa C30:0 | 0.24 ± 0.14  | 0.98 ± 0.10**    | 0.65 ± 0.16                  | 0.89 ± 0.13         | <b>Diet</b>          | 12.82  | 0.0008  |
|             |              |                  |                              |                     | <b>Strain</b>        | 1.39   | 0.24    |
|             |              |                  |                              |                     | <b>Diet X Strain</b> | 3.45   | 0.07    |
| PC aa C30:2 | -6.43 ± 0.07 | -5.53 ± 0.07**** | -5.98 ± 0.05 <sup>++++</sup> | -5.11 ± 0.06****@@@ | <b>Diet</b>          | 211.25 | <0.0001 |
|             |              |                  |                              |                     | <b>Strain</b>        | 51.16  | <0.0001 |
|             |              |                  |                              |                     | <b>Diet X Strain</b> | 0.04   | 0.84    |
| PC aa C32:0 | 3.86 ± 0.10  | 4.14 ± 0.07      | 4.35 ± 0.13 <sup>+</sup>     | 4.05 ± 0.12         | <b>Diet</b>          | 0.0009 | 0.98    |
|             |              |                  |                              |                     | <b>Strain</b>        | 3.25   | 0.08    |
|             |              |                  |                              |                     | <b>Diet X Strain</b> | 6.86   | 0.01    |
| PC aa C32:1 | 3.35 ± 0.12  | 4.13 ± 0.07***   | 3.35 ± 0.16                  | 3.38 ± 0.14@@@      | <b>Diet</b>          | 9.75   | 0.003   |
|             |              |                  |                              |                     | <b>Strain</b>        | 8.21   | 0.006   |
|             |              |                  |                              |                     | <b>Diet X Strain</b> | 8.21   | 0.006   |
| PC aa C32:2 | -0.55 ± 0.07 | -0.35 ± 0.07     | -0.51 ± 0.08                 | -0.43 ± 0.06        | <b>Diet</b>          | 4.01   | 0.05    |
|             |              |                  |                              |                     | <b>Strain</b>        | 0.07   | 0.79    |
|             |              |                  |                              |                     | <b>Diet X Strain</b> | 0.80   | 0.38    |
| PC aa C32:3 | -4.06 ± 0.07 | -3.67 ± 0.06**   | -3.78 ± 0.06 <sup>+</sup>    | -3.30 ± 0.07****@@@ | <b>Diet</b>          | 40.65  | <0.0001 |
|             |              |                  |                              |                     | <b>Strain</b>        | 23.10  | <0.0001 |
|             |              |                  |                              |                     | <b>Diet X Strain</b> | 0.46   | 0.50    |
| PC aa C34:1 | 6.88 ± 0.10  | 8.75 ± 0.08****  | 7.01 ± 0.10                  | 8.52 ± 0.14****     | <b>Diet</b>          | 251.74 | <0.0001 |
|             |              |                  |                              |                     | <b>Strain</b>        | 0.20   | 0.65    |
|             |              |                  |                              |                     | <b>Diet X Strain</b> | 2.71   | 0.11    |
| PC aa C34:2 | 8.19 ± 0.08  | 8.68 ± 0.07***   | 8.59 ± 0.07 <sup>++</sup>    | 8.70 ± 0.08         | <b>Diet</b>          | 16.40  | 0.0002  |
|             |              |                  |                              |                     | <b>Strain</b>        | 8.03   | 0.007   |
|             |              |                  |                              |                     | <b>Diet X Strain</b> | 6.62   | 0.01    |
| PC aa C34:3 | 4.05 ± 0.08  | 4.02 ± 0.08      | 3.63 ± 0.09 <sup>++</sup>    | 3.37 ± 0.09@@@      | <b>Diet</b>          | 2.85   | 0.10    |
|             |              |                  |                              |                     | <b>Strain</b>        | 38.23  | <0.0001 |
|             |              |                  |                              |                     | <b>Diet X Strain</b> | 1.81   | 0.19    |
| PC aa C34:4 | -0.57 ± 0.08 | -0.38 ± 0.09     | -0.89 ± 0.07 <sup>+</sup>    | -0.91 ± 0.10@@@     | <b>Diet</b>          | 1.10   | 0.30    |
|             |              |                  |                              |                     | <b>Strain</b>        | 26.69  | <0.0001 |
|             |              |                  |                              |                     | <b>Diet X Strain</b> | 1.62   | 0.21    |

|             |              |                             |                             |                               |                                 |                         |                            |
|-------------|--------------|-----------------------------|-----------------------------|-------------------------------|---------------------------------|-------------------------|----------------------------|
| PC aa C36:0 | 0.63 ± 0.05  | 0.39 ± 0.15                 | 1.12 ± 0.08 <sup>++</sup>   | 0.80 ± 0.10 <sup>@</sup>      | Diet<br>Strain<br>Diet X Strain | 9.61<br>12.60<br>0.72   | 0.003<br>0.0009<br>0.40    |
| PC aa C36:1 | 4.29 ± 0.12  | 7.31 ± 0.10 <sup>****</sup> | 4.38 ± 0.09                 | 7.36 ± 0.08 <sup>****</sup>   | Diet<br>Strain<br>Diet X Strain | 618.63<br>1.47<br>0.23  | <0.0001<br>0.23<br>0.64    |
| PC aa C36:2 | 7.38 ± 0.07  | 8.81 ± 0.07 <sup>****</sup> | 7.93 ± 0.05 <sup>++++</sup> | 9.12 ± 0.06 <sup>****@@</sup> | Diet<br>Strain<br>Diet X Strain | 440.90<br>47.39<br>3.40 | <0.0001<br><0.0001<br>0.07 |
| PC aa C36:3 | 6.37 ± 0.08  | 7.71 ± 0.08 <sup>****</sup> | 6.30 ± 0.05                 | 7.43 ± 0.08 <sup>****</sup>   | Diet<br>Strain<br>Diet X Strain | 304.61<br>5.89<br>2.15  | <0.0001<br>0.02<br>0.15    |
| PC aa C36:4 | 7.18 ± 0.08  | 7.63 ± 0.08 <sup>***</sup>  | 7.41 ± 0.05                 | 7.60 ± 0.08                   | Diet<br>Strain<br>Diet X Strain | 19.88<br>2.01<br>3.43   | <0.0001<br>0.16<br>0.07    |
| PC aa C36:5 | 2.98 ± 0.09  | 3.17 ± 0.08                 | 2.70 ± 0.06                 | 2.65 ± 0.10 <sup>@@@</sup>    | Diet<br>Strain<br>Diet X Strain | 0.79<br>23.19<br>2.05   | 0.38<br><0.0001<br>0.16    |
| PC aa C36:6 | -1.31 ± 0.09 | -1.25 ± 0.08                | -1.39 ± 0.08                | -1.47 ± 0.08                  | Diet<br>Strain<br>Diet X Strain | 0.01<br>3.18<br>0.79    | 0.91<br>0.08<br>0.38       |
| PC aa C38:0 | 0.38 ± 0.07  | 0.80 ± 0.05 <sup>****</sup> | 0.72 ± 0.06 <sup>++</sup>   | 1.05 ± 0.06 <sup>**@</sup>    | Diet<br>Strain<br>Diet X Strain | 38.76<br>23.86<br>0.50  | <0.0001<br><0.0001<br>0.48 |
| PC aa C38:1 | -2.70 ± 0.98 | 0.13 ± 0.27 <sup>**</sup>   | -2.10 ± 0.47                | 0.45 ± 0.16 <sup>**</sup>     | Diet<br>Strain<br>Diet X Strain | 29.48<br>0.87<br>0.07   | <0.0001<br>0.36<br>0.79    |
| PC aa C38:3 | 4.55 ± 0.10  | 6.07 ± 0.07 <sup>****</sup> | 4.79 ± 0.04                 | 5.90 ± 0.07 <sup>****</sup>   | Diet<br>Strain<br>Diet X Strain | 311.10<br>0.24<br>7.77  | <0.0001<br>0.63<br>0.008   |
| PC aa C38:4 | 6.28 ± 0.08  | 6.95 ± 0.11 <sup>****</sup> | 6.62 ± 0.07                 | 7.13 ± 0.10 <sup>**</sup>     | Diet<br>Strain<br>Diet X Strain | 41.13<br>7.98<br>0.75   | <0.0001<br>0.007<br>0.39   |
| PC aa C38:5 |              |                             |                             |                               | Diet                            | 60.13                   | <0.0001                    |

|             |              |                  |                              |                           |                      |       |         |
|-------------|--------------|------------------|------------------------------|---------------------------|----------------------|-------|---------|
|             | 5.05 ± 0.11  | 5.67 ± 0.09****  | 5.15 ± 0.06                  | 5.81 ± 0.07****           | <b>Strain</b>        | 2.15  | 0.15    |
|             |              |                  |                              |                           | <b>Diet X Strain</b> | 0.05  | 0.82    |
| PC aa C38:6 | 6.63 ± 0.09  | 6.50 ± 0.08      | 6.95 ± 0.05 <sup>+</sup>     | 6.70 ± 0.09               | <b>Diet</b>          | 6.15  | 0.02    |
|             |              |                  |                              |                           | <b>Strain</b>        | 10.61 | 0.002   |
|             |              |                  |                              |                           | <b>Diet X Strain</b> | 0.56  | 0.46    |
| PC aa C40:1 | -2.00 ± 0.09 | -1.93 ± 0.07     | -1.79 ± 0.09                 | -1.72 ± 0.05              | <b>Diet</b>          | 0.82  | 0.37    |
|             |              |                  |                              |                           | <b>Strain</b>        | 7.50  | 0.009   |
|             |              |                  |                              |                           | <b>Diet X Strain</b> | 0.01  | 0.94    |
| PC aa C40:2 | -1.91 ± 0.12 | -1.68 ± 0.08     | -1.28 ± 0.05 <sup>++++</sup> | -1.31 ± 0.09 <sup>@</sup> | <b>Diet</b>          | 1.27  | 0.26    |
|             |              |                  |                              |                           | <b>Strain</b>        | 32.18 | <0.0001 |
|             |              |                  |                              |                           | <b>Diet X Strain</b> | 2.05  | 0.16    |
| PC aa C40:3 | -0.84 ± 0.09 | -0.22 ± 0.09**** | -0.68 ± 0.07                 | -0.27 ± 0.05**            | <b>Diet</b>          | 43.94 | <0.0001 |
|             |              |                  |                              |                           | <b>Strain</b>        | 0.49  | 0.49    |
|             |              |                  |                              |                           | <b>Diet X Strain</b> | 2.00  | 0.16    |
| PC aa C40:4 | 1.64 ± 0.10  | 2.17 ± 0.09****  | 2.02 ± 0.06 <sup>+</sup>     | 2.34 ± 0.07*              | <b>Diet</b>          | 30.19 | <0.0001 |
|             |              |                  |                              |                           | <b>Strain</b>        | 12.43 | 0.001   |
|             |              |                  |                              |                           | <b>Diet X Strain</b> | 2.08  | 0.16    |
| PC aa C40:5 | 2.23 ± 0.12  | 2.92 ± 0.11****  | 2.81 ± 0.06 <sup>+++</sup>   | 3.53 ± 0.08****@@@        | <b>Diet</b>          | 56.61 | <0.0001 |
|             |              |                  |                              |                           | <b>Strain</b>        | 40.04 | <0.0001 |
|             |              |                  |                              |                           | <b>Diet X Strain</b> | 0.02  | 0.88    |
| PC aa C40:6 | 4.85 ± 0.09  | 4.97 ± 0.08      | 5.42 ± 0.07 <sup>+++</sup>   | 5.34 ± 0.10 <sup>@</sup>  | <b>Diet</b>          | 0.06  | 0.81    |
|             |              |                  |                              |                           | <b>Strain</b>        | 30.60 | <0.0001 |
|             |              |                  |                              |                           | <b>Diet X Strain</b> | 1.43  | 0.24    |
| PC aa C42:0 | -2.67 ± 0.09 | -2.55 ± 0.12     | -2.22 ± 0.10 <sup>+</sup>    | -2.40 ± 0.09              | <b>Diet</b>          | 0.07  | 0.79    |
|             |              |                  |                              |                           | <b>Strain</b>        | 8.53  | 0.006   |
|             |              |                  |                              |                           | <b>Diet X Strain</b> | 1.99  | 0.17    |
| PC aa C42:1 | -2.83 ± 0.10 | -2.83 ± 0.09     | -2.53 ± 0.08                 | -2.62 ± 0.13              | <b>Diet</b>          | 0.22  | 0.64    |
|             |              |                  |                              |                           | <b>Strain</b>        | 6.44  | 0.01    |
|             |              |                  |                              |                           | <b>Diet X Strain</b> | 0.19  | 0.67    |
| PC aa C42:2 | -2.27 ± 0.10 | -2.17 ± 0.05     | -1.73 ± 0.09 <sup>++++</sup> | -2.14 ± 0.06**            | <b>Diet</b>          | 3.75  | 0.06    |
|             |              |                  |                              |                           | <b>Strain</b>        | 12.57 | 0.0009  |
|             |              |                  |                              |                           | <b>Diet X Strain</b> | 10.07 | 0.003   |
| PC aa C42:4 | -2.47 ± 0.06 | -2.53 ± 0.11     | -2.15 ± 0.08 <sup>+</sup>    | -2.28 ± 0.08              | <b>Diet</b>          | 1.25  | 0.27    |
|             |              |                  |                              |                           | <b>Strain</b>        | 11.97 | 0.001   |

|                                               |              |                              |                              |                                  |                      |        |         |
|-----------------------------------------------|--------------|------------------------------|------------------------------|----------------------------------|----------------------|--------|---------|
|                                               |              |                              |                              |                                  | <b>Diet X Strain</b> | 0.17   | 0.69    |
| PC aa C42:5                                   | -1.76 ± 0.11 | -1.92 ± 0.06                 | -1.25 ± 0.08 <sup>+++</sup>  | -1.69 ± 0.10 <sup>**</sup>       | <b>Diet</b>          | 10.81  | 0.002   |
|                                               |              |                              |                              |                                  | <b>Strain</b>        | 17.12  | 0.0002  |
|                                               |              |                              |                              |                                  | <b>Diet X Strain</b> | 2.61   | 0.11    |
| PC aa C42:6                                   | -0.04 ± 0.08 | -0.27 ± 0.09                 | 0.36 ± 0.08 <sup>++</sup>    | 0.12 ± 0.07 <sup>@</sup>         | <b>Diet</b>          | 8.25   | 0.006   |
|                                               |              |                              |                              |                                  | <b>Strain</b>        | 22.98  | <0.0001 |
|                                               |              |                              |                              |                                  | <b>Diet X Strain</b> | 0.01   | 0.93    |
| <b><i>Phosphatidylcholine acyl-alkyls</i></b> |              |                              |                              |                                  |                      |        |         |
| PC ae C30:0                                   | -2.56 ± 0.07 | -2.33 ± 0.03*                | -2.38 ± 0.04                 | -2.26 ± 0.05                     | <b>Diet</b>          | 12.43  | 0.001   |
|                                               |              |                              |                              |                                  | <b>Strain</b>        | 6.67   | 0.01    |
|                                               |              |                              |                              |                                  | <b>Diet X Strain</b> | 1.19   | 0.28    |
| PC ae C30:1                                   | -4.07 ± 0.12 | -3.89 ± 0.19                 | -4.06 ± 0.24                 | -3.73 ± 0.29                     | <b>Diet</b>          | 1.33   | 0.25    |
|                                               |              |                              |                              |                                  | <b>Strain</b>        | 0.15   | 0.70    |
|                                               |              |                              |                              |                                  | <b>Diet X Strain</b> | 0.11   | 0.74    |
| PC ae C30:2                                   | -1.95 ± 0.05 | -1.35 ± 0.08                 | -1.38 ± 0.06                 | -2.79 ± 0.33 <sup>*****@@@</sup> | <b>Diet</b>          | 5.62   | 0.02    |
|                                               |              |                              |                              |                                  | <b>Strain</b>        | 6.45   | 0.01    |
|                                               |              |                              |                              |                                  | <b>Diet X Strain</b> | 34.76  | <0.0001 |
| PC ae C32:1                                   | -0.36 ± 0.06 | 0.12 ± 0.07 <sup>****</sup>  | 0.14 ± 0.05 <sup>++++</sup>  | 0.60 ± 0.08 <sup>*****@@@</sup>  | <b>Diet</b>          | 48.53  | <0.0001 |
|                                               |              |                              |                              |                                  | <b>Strain</b>        | 52.43  | <0.0001 |
|                                               |              |                              |                              |                                  | <b>Diet X Strain</b> | 0.03   | 0.86    |
| PC ae C32:2                                   | -2.88 ± 0.08 | -1.60 ± 0.09 <sup>****</sup> | -2.40 ± 0.06 <sup>+++</sup>  | -1.34 ± 0.09 <sup>****</sup>     | <b>Diet</b>          | 211.46 | <0.0001 |
|                                               |              |                              |                              |                                  | <b>Strain</b>        | 21.03  | <0.0001 |
|                                               |              |                              |                              |                                  | <b>Diet X Strain</b> | 1.86   | 0.18    |
| PC ae C34:0                                   | -0.98 ± 0.07 | -0.65 ± 0.06*                | -0.24 ± 0.09 <sup>++++</sup> | -0.27 ± 0.06 <sup>@@</sup>       | <b>Diet</b>          | 4.64   | 0.04    |
|                                               |              |                              |                              |                                  | <b>Strain</b>        | 62.51  | <0.0001 |
|                                               |              |                              |                              |                                  | <b>Diet X Strain</b> | 6.32   | 0.02    |
| PC ae C34:1                                   | 1.79 ± 0.07  | 2.94 ± 0.05 <sup>****</sup>  | 1.88 ± 0.07                  | 2.93 ± 0.10 <sup>****</sup>      | <b>Diet</b>          | 233.91 | <0.0001 |
|                                               |              |                              |                              |                                  | <b>Strain</b>        | 0.32   | 0.57    |
|                                               |              |                              |                              |                                  | <b>Diet X Strain</b> | 0.49   | 0.49    |
| PC ae C34:2                                   | 1.72 ± 0.08  | 1.70 ± 0.05                  | 2.26 ± 0.08 <sup>++++</sup>  | 2.33 ± 0.06 <sup>@@@@</sup>      | <b>Diet</b>          | 0.09   | 0.77    |
|                                               |              |                              |                              |                                  | <b>Strain</b>        | 67.52  | <0.0001 |
|                                               |              |                              |                              |                                  | <b>Diet X Strain</b> | 0.44   | 0.51    |
| PC ae C34:3                                   |              |                              |                              |                                  | <b>Diet</b>          | 74.40  | <0.0001 |

|             |                  |                          |                        |                            |                      |        |         |
|-------------|------------------|--------------------------|------------------------|----------------------------|----------------------|--------|---------|
|             | $-0.10 \pm 0.08$ | $0.61 \pm 0.07^{****}$   | $0.66 \pm 0.06^{++++}$ | $1.27 \pm 0.09^{*****@@@}$ | <b>Strain</b>        | 87.13  | <0.0001 |
|             |                  |                          |                        |                            | <b>Diet X Strain</b> | 0.45   | 0.51    |
| PC ae C36:0 | $-1.26 \pm 0.08$ | $-0.52 \pm 0.06^{*****}$ | $-0.83 \pm 0.06^{+++}$ | $-0.27 \pm 0.07^{*****}$   | <b>Diet</b>          | 90.34  | <0.0001 |
|             |                  |                          |                        |                            | <b>Strain</b>        | 25.08  | <0.0001 |
|             |                  |                          |                        |                            | <b>Diet X Strain</b> | 1.72   | 0.20    |
| PC ae C36:1 | $0.64 \pm 0.08$  | $2.17 \pm 0.05^{****}$   | $1.23 \pm 0.07^{++++}$ | $2.41 \pm 0.07^{****}$     | <b>Diet</b>          | 256.70 | <0.0001 |
|             |                  |                          |                        |                            | <b>Strain</b>        | 28.46  | <0.0001 |
|             |                  |                          |                        |                            | <b>Diet X Strain</b> | 1.70   | 0.20    |
| PC ae C36:2 | $2.87 \pm 0.07$  | $3.26 \pm 0.05^{***}$    | $3.80 \pm 0.06^{++++}$ | $3.76 \pm 0.06^{@@@}$      | <b>Diet</b>          | 8.96   | 0.004   |
|             |                  |                          |                        |                            | <b>Strain</b>        | 144.82 | <0.0001 |
|             |                  |                          |                        |                            | <b>Diet X Strain</b> | 12.96  | 0.0008  |
| PC ae C36:3 | $1.02 \pm 0.07$  | $1.77 \pm 0.05^{****}$   | $1.19 \pm 0.07$        | $1.84 \pm 0.08^{****}$     | <b>Diet</b>          | 105.32 | <0.0001 |
|             |                  |                          |                        |                            | <b>Strain</b>        | 3.23   | 0.08    |
|             |                  |                          |                        |                            | <b>Diet X Strain</b> | 0.52   | 0.47    |
| PC ae C36:4 | $1.90 \pm 0.08$  | $2.34 \pm 0.05^{***}$    | $2.20 \pm 0.07^{+}$    | $2.53 \pm 0.07^{**}$       | <b>Diet</b>          | 31.60  | <0.0001 |
|             |                  |                          |                        |                            | <b>Strain</b>        | 12.85  | 0.0008  |
|             |                  |                          |                        |                            | <b>Diet X Strain</b> | 0.65   | 0.42    |
| PC ae C36:5 | $0.84 \pm 0.09$  | $1.32 \pm 0.06^{***}$    | $1.34 \pm 0.06^{++++}$ | $1.90 \pm 0.08^{*****@@@}$ | <b>Diet</b>          | 50.30  | <0.0001 |
|             |                  |                          |                        |                            | <b>Strain</b>        | 54.23  | <0.0001 |
|             |                  |                          |                        |                            | <b>Diet X Strain</b> | 0.32   | 0.57    |
| PC ae C38:0 | $1.51 \pm 0.10$  | $1.29 \pm 0.08$          | $1.30 \pm 0.07$        | $1.22 \pm 0.07$            | <b>Diet</b>          | 3.29   | 0.08    |
|             |                  |                          |                        |                            | <b>Strain</b>        | 2.84   | 0.10    |
|             |                  |                          |                        |                            | <b>Diet X Strain</b> | 0.74   | 0.39    |
| PC ae C38:1 | $-1.85 \pm 0.15$ | $-0.69 \pm 0.12^{****}$  | $-1.51 \pm 0.19$       | $-0.32 \pm 0.14^{****}$    | <b>Diet</b>          | 59.06  | <0.0001 |
|             |                  |                          |                        |                            | <b>Strain</b>        | 5.36   | 0.03    |
|             |                  |                          |                        |                            | <b>Diet X Strain</b> | 0.003  | 0.96    |
| PC ae C38:2 | $0.33 \pm 0.08$  | $0.07 \pm 0.08$          | $1.58 \pm 0.07^{++++}$ | $0.71 \pm 0.07^{*****@@@}$ | <b>Diet</b>          | 56.51  | <0.0001 |
|             |                  |                          |                        |                            | <b>Strain</b>        | 156.60 | <0.0001 |
|             |                  |                          |                        |                            | <b>Diet X Strain</b> | 16.09  | 0.0002  |
| PC ae C38:3 | $-0.20 \pm 0.08$ | $0.64 \pm 0.06^{****}$   | $0.41 \pm 0.05^{++++}$ | $0.92 \pm 0.04^{*****@}$   | <b>Diet</b>          | 120.33 | <0.0001 |
|             |                  |                          |                        |                            | <b>Strain</b>        | 51.18  | <0.0001 |
|             |                  |                          |                        |                            | <b>Diet X Strain</b> | 7.34   | 0.01    |
| PC ae C38:4 | $1.94 \pm 0.07$  | $2.38 \pm 0.07^{***}$    | $2.64 \pm 0.07^{++++}$ | $2.76 \pm 0.08^{@@}$       | <b>Diet</b>          | 14.93  | 0.0004  |
|             |                  |                          |                        |                            | <b>Strain</b>        | 57.20  | <0.0001 |

|             |              |                  |                              |                             |                      |        |         |
|-------------|--------------|------------------|------------------------------|-----------------------------|----------------------|--------|---------|
|             |              |                  |                              |                             | <b>Diet X Strain</b> | 5.05   | 0.03    |
| PC ae C38:5 | 1.74 ± 0.07  | 2.58 ± 0.04****  | 1.79 ± 0.06                  | 2.65 ± 0.06****             | <b>Diet</b>          | 210.03 | <0.0001 |
|             |              |                  |                              |                             | <b>Strain</b>        | 1.09   | 0.30    |
|             |              |                  |                              |                             | <b>Diet X Strain</b> | 0.06   | 0.80    |
| PC ae C38:6 | 0.91 ± 0.08  | 1.03 ± 0.05      | 1.59 ± 0.06 <sup>++++</sup>  | 1.65 ± 0.07 <sup>@@@@</sup> | <b>Diet</b>          | 1.84   | 0.18    |
|             |              |                  |                              |                             | <b>Strain</b>        | 99.78  | <0.0001 |
|             |              |                  |                              |                             | <b>Diet X Strain</b> | 0.16   | 0.69    |
| PC ae C40:1 | 1.25 ± 0.06  | 1.37 ± 0.08      | 1.22 ± 0.08                  | 1.48 ± 0.05                 | <b>Diet</b>          | 6.76   | 0.01    |
|             |              |                  |                              |                             | <b>Strain</b>        | 0.33   | 0.57    |
|             |              |                  |                              |                             | <b>Diet X Strain</b> | 0.99   | 0.33    |
| PC ae C40:2 | -1.41 ± 0.06 | -1.11 ± 0.06**   | -0.81 ± 0.06 <sup>++++</sup> | -0.91 ± 0.04                | <b>Diet</b>          | 1.32   | 0.26    |
|             |              |                  |                              |                             | <b>Strain</b>        | 48.79  | <0.0001 |
|             |              |                  |                              |                             | <b>Diet X Strain</b> | 7.85   | 0.007   |
| PC ae C40:3 | -2.10 ± 0.08 | -1.66 ± 0.07***  | -1.62 ± 0.08 <sup>++++</sup> | -1.52 ± 0.04                | <b>Diet</b>          | 17.06  | 0.0002  |
|             |              |                  |                              |                             | <b>Strain</b>        | 21.89  | <0.0001 |
|             |              |                  |                              |                             | <b>Diet X Strain</b> | 6.83   | 0.01    |
| PC ae C40:4 | 0.40 ± 0.07  | 0.05 ± 0.08*     | 1.07 ± 0.08 <sup>++++</sup>  | 0.42 ± 0.08****@            | <b>Diet</b>          | 41.17  | <0.0001 |
|             |              |                  |                              |                             | <b>Strain</b>        | 43.97  | <0.0001 |
|             |              |                  |                              |                             | <b>Diet X Strain</b> | 3.76   | 0.06    |
| PC ae C40:5 | -0.79 ± 0.09 | -0.28 ± 0.06**** | -0.30 ± 0.06 <sup>++++</sup> | -0.06 ± 0.05*               | <b>Diet</b>          | 36.63  | <0.0001 |
|             |              |                  |                              |                             | <b>Strain</b>        | 31.31  | <0.0001 |
|             |              |                  |                              |                             | <b>Diet X Strain</b> | 4.46   | 0.04    |
| PC ae C40:6 | 1.06 ± 0.07  | 0.90 ± 0.05      | 1.90 ± 0.07 <sup>++++</sup>  | 1.60 ± 0.09*@@@@            | <b>Diet</b>          | 10.87  | 0.002   |
|             |              |                  |                              |                             | <b>Strain</b>        | 119.50 | <0.0001 |
|             |              |                  |                              |                             | <b>Diet X Strain</b> | 0.98   | 0.33    |
| PC ae C42:0 | -2.67 ± 0.09 | -2.55 ± 0.12**   | -2.22 ± 0.10                 | -2.40 ± 0.09**              | <b>Diet</b>          | 23.53  | <0.0001 |
|             |              |                  |                              |                             | <b>Strain</b>        | 3.19   | 0.08    |
|             |              |                  |                              |                             | <b>Diet X Strain</b> | 0.003  | 0.96    |
| PC ae C42:1 | -1.30 ± 0.09 | -1.15 ± 0.09     | -0.96 ± 0.06 <sup>++</sup>   | -1.01 ± 0.03                | <b>Diet</b>          | 0.45   | 0.51    |
|             |              |                  |                              |                             | <b>Strain</b>        | 11.85  | 0.001   |
|             |              |                  |                              |                             | <b>Diet X Strain</b> | 2.08   | 0.16    |
| PC ae C42:2 | -1.50 ± 0.11 | -0.70 ± 0.07**** | -1.32 ± 0.08                 | -0.71 ± 0.05****            | <b>Diet</b>          | 75.03  | <0.0001 |
|             |              |                  |                              |                             | <b>Strain</b>        | 1.16   | 0.29    |
|             |              |                  |                              |                             | <b>Diet X Strain</b> | 1.32   | 0.26    |

|                      |              |                              |                              |                                |                                 |                          |                            |
|----------------------|--------------|------------------------------|------------------------------|--------------------------------|---------------------------------|--------------------------|----------------------------|
| PC ae C42:3          | -0.60 ± 0.10 | -0.56 ± 0.07                 | -0.78 ± 0.05                 | -0.64 ± 0.10                   | Diet<br>Strain<br>Diet X Strain | 1.19<br>2.46<br>0.31     | 0.28<br>0.12<br>0.58       |
| PC ae C42:4          | -2.74 ± 0.10 | -2.82 ± 0.15                 | -2.46 ± 0.05                 | -2.77 ± 0.08                   | Diet<br>Strain<br>Diet X Strain | 3.86<br>2.70<br>1.43     | 0.06<br>0.11<br>0.24       |
| PC ae C42:5          | -1.23 ± 0.06 | -1.16 ± 0.05                 | -0.74 ± 0.05 <sup>++++</sup> | -0.97 ± 0.04*                  | Diet<br>Strain<br>Diet X Strain | 0.55<br>37.19<br>3.44    | 0.46<br><0.0001<br>0.07    |
| PC ae C44:3          | -3.07 ± 0.10 | -3.02 ± 0.13                 | -3.20 ± 0.09                 | -3.04 ± 0.09                   | Diet<br>Strain<br>Diet X Strain | 0.95<br>0.48<br>0.29     | 0.34<br>0.49<br>0.59       |
| PC ae C44:4          | -2.61 ± 0.09 | -2.42 ± 0.10                 | -2.51 ± 0.21                 | -2.44 ± 0.10                   | Diet<br>Strain<br>Diet X Strain | 1.10<br>0.10<br>0.22     | 0.30<br>0.75<br>0.64       |
| PC ae C44:5          | -2.06 ± 0.08 | -1.96 ± 0.12                 | -2.06 ± 0.08                 | -2.05 ± 0.07                   | Diet<br>Strain<br>Diet X Strain | 0.37<br>0.33<br>0.27     | 0.55<br>0.57<br>0.61       |
| PC ae C44:6          | -2.41 ± 0.15 | -2.84 ± 0.07                 | -2.22 ± 0.19                 | -2.44 ± 0.14                   | Diet<br>Strain<br>Diet X Strain | 5.03<br>4.21<br>0.47     | 0.03<br>0.05<br>0.50       |
| <b>Sphingolipids</b> |              |                              |                              |                                |                                 |                          |                            |
| SM(OH) C14:1         | 0.17 ± 0.06  | 0.87 ± 0.07 <sup>****</sup>  | 0.95 ± 0.06 <sup>++++</sup>  | 1.72 ± 0.04 <sup>****@@@</sup> | Diet<br>Strain<br>Diet X Strain | 153.01<br>190.26<br>0.34 | <0.0001<br><0.0001<br>0.56 |
| SM(OH) C16:1         | -0.89 ± 0.06 | -0.50 ± 0.05 <sup>****</sup> | -0.38 ± 0.06 <sup>++++</sup> | 0.14 ± 0.05 <sup>****@@@</sup> | Diet<br>Strain<br>Diet X Strain | 73.57<br>116.19<br>1.55  | <0.0001<br><0.0001<br>0.22 |
| SM(OH) C22:1         | 1.15 ± 0.08  | 1.56 ± 0.06 <sup>***</sup>   | 2.04 ± 0.05 <sup>++++</sup>  | 2.18 ± 0.07 <sup>@@@</sup>     | Diet<br>Strain<br>Diet X Strain | 16.63<br>124.66<br>3.83  | 0.0002<br><0.0001<br>0.06  |
| SM(OH) C22:2         |              |                              |                              |                                | Diet                            | 57.77                    | <0.0001                    |



|              |              |                             |                             |                                 |                      |        |         |
|--------------|--------------|-----------------------------|-----------------------------|---------------------------------|----------------------|--------|---------|
|              | 2.28 ± 0.07  | 1.96 ± 0.07*                | 3.41 ± 0.08 <sup>++++</sup> | 2.69 ± 0.05 <sup>*****@@@</sup> | <b>Strain</b>        | 184.09 | <0.0001 |
|              |              |                             |                             |                                 | <b>Diet X Strain</b> | 8.81   | 0.005   |
| SM(OH) C24:1 | 0.53 ± 0.07  | 0.64 ± 0.07                 | 0.42 ± 0.07                 | 0.65 ± 0.08                     | <b>Diet</b>          | 5.72   | 0.02    |
|              |              |                             |                             |                                 | <b>Strain</b>        | 0.50   | 0.48    |
|              |              |                             |                             |                                 | <b>Diet X Strain</b> | 0.77   | 0.38    |
| SM C16:0     | 4.10 ± 0.06  | 5.03 ± 0.06 <sup>****</sup> | 4.58 ± 0.04 <sup>++++</sup> | 5.43 ± 0.04 <sup>*****@@@</sup> | <b>Diet</b>          | 306.49 | <0.0001 |
|              |              |                             |                             |                                 | <b>Strain</b>        | 76.63  | <0.0001 |
|              |              |                             |                             |                                 | <b>Diet X Strain</b> | 0.66   | 0.42    |
| SM C16:1     | 1.88 ± 0.06  | 2.35 ± 0.04 <sup>****</sup> | 2.53 ± 0.05 <sup>++++</sup> | 2.96 ± 0.07 <sup>*****@@@</sup> | <b>Diet</b>          | 64.96  | <0.0001 |
|              |              |                             |                             |                                 | <b>Strain</b>        | 124.59 | <0.0001 |
|              |              |                             |                             |                                 | <b>Diet X Strain</b> | 0.13   | 0.72    |
| SM C18:0     | 2.85 ± 0.09  | 3.62 ± 0.06 <sup>****</sup> | 2.95 ± 0.12                 | 3.43 ± 0.10 <sup>**</sup>       | <b>Diet</b>          | 43.44  | <0.0001 |
|              |              |                             |                             |                                 | <b>Strain</b>        | 0.19   | 0.66    |
|              |              |                             |                             |                                 | <b>Diet X Strain</b> | 2.21   | 0.14    |
| SM C18:1     | 0.64 ± 0.04  | 0.98 ± 0.06 <sup>**</sup>   | 0.69 ± 0.07                 | 1.21 ± 0.07 <sup>****</sup>     | <b>Diet</b>          | 48.73  | <0.0001 |
|              |              |                             |                             |                                 | <b>Strain</b>        | 5.22   | 0.03    |
|              |              |                             |                             |                                 | <b>Diet X Strain</b> | 2.14   | 0.15    |
| SM C20:2     | -0.33 ± 0.07 | -0.38 ± 0.08                | -0.78 ± 0.09 <sup>++</sup>  | -1.09 ± 0.10 <sup>@@@@</sup>    | <b>Diet</b>          | 4.40   | 0.04    |
|              |              |                             |                             |                                 | <b>Strain</b>        | 45.10  | <0.0001 |
|              |              |                             |                             |                                 | <b>Diet X Strain</b> | 2.26   | 0.14    |
| SM C22:3     | -2.63 ± 0.07 | -2.17 ± 0.08 <sup>***</sup> | -2.37 ± 0.06                | -2.18 ± 0.09                    | <b>Diet</b>          | 18.72  | <0.0001 |
|              |              |                             |                             |                                 | <b>Strain</b>        | 2.87   | 0.10    |
|              |              |                             |                             |                                 | <b>Diet X Strain</b> | 3.46   | 0.07    |
| SM C24:0     | 3.05 ± 0.11  | 3.69 ± 0.06 <sup>****</sup> | 3.81 ± 0.08 <sup>++++</sup> | 3.90 ± 0.07                     | <b>Diet</b>          | 20.53  | <0.0001 |
|              |              |                             |                             |                                 | <b>Strain</b>        | 35.14  | <0.0001 |
|              |              |                             |                             |                                 | <b>Diet X Strain</b> | 11.47  | 0.001   |
| SM C24:1     | 4.29 ± 0.08  | 4.18 ± 0.14                 | 488 ± 0.05 <sup>+++</sup>   | 4.63 ± 0.07 <sup>@@</sup>       | <b>Diet</b>          | 4.22   | 0.05    |
|              |              |                             |                             |                                 | <b>Strain</b>        | 34.12  | <0.0001 |
|              |              |                             |                             |                                 | <b>Diet X Strain</b> | 0.72   | 0.40    |
| SM C26:0     | -2.07 ± 0.09 | -1.94 ± 0.08                | -1.80 ± 0.09                | -1.87 ± 0.10                    | <b>Diet</b>          | 0.11   | 0.75    |
|              |              |                             |                             |                                 | <b>Strain</b>        | 3.29   | 0.08    |
|              |              |                             |                             |                                 | <b>Diet X Strain</b> | 1.28   | 0.26    |
| SM C26:1     | -2.42 ± 0.13 | -2.32 ± 0.10                | -1.92 ± 0.14 <sup>+</sup>   | -2.21 ± 0.13                    | <b>Diet</b>          | 0.58   | 0.45    |
|              |              |                             |                             |                                 | <b>Strain</b>        | 6.05   | 0.02    |

|                                        |                  |                 |                            |                  |               |        |         |
|----------------------------------------|------------------|-----------------|----------------------------|------------------|---------------|--------|---------|
|                                        |                  |                 |                            |                  | Diet X Strain | 2.53   | 0.12    |
| <b>Monosaccharides</b>                 |                  |                 |                            |                  |               |        |         |
| Hexoses (H1)                           | 12.79 ± 0.23     | 13.28 ± 0.07    | 13.05 ± 0.17               | 12.78 ± 0.14     | Diet Strain   | 0.46   | 0.50    |
|                                        |                  |                 |                            |                  | Diet X Strain | 0.48   | 0.49    |
|                                        |                  |                 |                            |                  | Diet X Strain | 5.08   | 0.03    |
| <b>Metabolite ratios</b>               |                  |                 |                            |                  |               |        |         |
| Short chain<br>acylcarnitines (SCACs)  | 3.85 ± 0.07      | 2.89 ± 0.08**** | 4.53 ± 0.16 <sup>+++</sup> | 2.96 ± 0.12****  | Diet          | 122.43 | <0.0001 |
|                                        |                  |                 |                            |                  | Strain        | 10.78  | 0.002   |
|                                        |                  |                 |                            |                  | Diet X Strain | 7.12   | 0.01    |
| Medium chain<br>acylcarnitines (MCACs) | -0.33 ± 0.05     | -0.31 ± 0.05    | -0.25 ± 0.03               | -0.31 ± 0.05     | Diet          | 0.16   | 0.69    |
|                                        |                  |                 |                            |                  | Strain        | 0.94   | 0.34    |
|                                        |                  |                 |                            |                  | Diet X Strain | 0.95   | 0.34    |
| Long chain acylcarnitines<br>(LCACs)   | 0.34 ± 0.05      | 0.22 ± 0.04     | 0.72 ± 0.14 <sup>+</sup>   | 0.35 ± 0.07*     | Diet          | 8.00   | 0.007   |
|                                        |                  |                 |                            |                  | Strain        | 8.78   | 0.005   |
|                                        |                  |                 |                            |                  | Diet X Strain | 2.01   | 0.16    |
| (C2+C3) / C0                           | -0.94 ± 0.09     | -1.02 ± 0.06    | -0.25 ± 0.25 <sup>+</sup>  | -0.63 ± 0.18     | Diet          | 1.86   | 0.18    |
|                                        |                  |                 |                            |                  | Strain        | 10.15  | 0.003   |
|                                        |                  |                 |                            |                  | Diet X Strain | 0.77   | 0.38    |
| C3/C4                                  | 0.52 ± 0.08      | 0.79 ± 0.05     | 0.39 ± 0.08                | 0.91 ± 0.08****  | Diet          | 30.92  | <0.0001 |
|                                        |                  |                 |                            |                  | Strain        | 0.01   | 0.94    |
|                                        |                  |                 |                            |                  | Diet X Strain | 3.25   | 0.08    |
| C4/C0                                  | -5.55 ± 0.11***  | -4.87 ± 0.07    | -5.15 ± 0.15               | -4.50 ± 0.09***  | Diet          | 36.50  | <0.0001 |
|                                        |                  |                 |                            |                  | Strain        | 11.93  | 0.001   |
|                                        |                  |                 |                            |                  | Diet X Strain | 0.02   | 0.89    |
| C4/C5                                  | 0.28 ± 0.09**    | -0.19 ± 0.07    | 0.53 ± 0.09                | -0.23 ± 0.09**** | Diet          | 49.53  | <0.0001 |
|                                        |                  |                 |                            |                  | Strain        | 1.47   | 0.23    |
|                                        |                  |                 |                            |                  | Diet X Strain | 2.62   | 0.11    |
| C5/C0                                  | -5.83 ± 0.08**** | -4.68 ± 0.12    | -5.68 ± 0.13               | -4.27 ± 0.12**** | Diet          | 126.77 | <0.0001 |
|                                        |                  |                 |                            |                  | Strain        | 5.99   | 0.02    |
|                                        |                  |                 |                            |                  | Diet X Strain | 1.20   | 0.28    |

|                             |                  |                  |                             |                  |                                 |                         |                           |
|-----------------------------|------------------|------------------|-----------------------------|------------------|---------------------------------|-------------------------|---------------------------|
| C3/C0                       | -5.03 ± 0.07**** | -4.08 ± 0.10     | -4.77 ± 0.11 <sup>++</sup>  | -3.59 ± 0.11**** | Diet<br>Strain<br>Diet X Strain | 120.14<br>15.19<br>1.32 | 0.00<br>0.0003<br>0.26    |
| C18/C18:1                   | -0.52 ± 0.14*    | 0.003 ± 0.10     | -0.50 ± 0.10                | 0.01 ± 0.09**    | Diet<br>Strain<br>Diet X Strain | 22.24<br>0.01<br>0.001  | <0.0001<br>0.93<br>0.98   |
| (C16 + C18)/C0<br>(CPT-1)   | -6.73 ± 0.08     | -5.55 ± 0.10**** | -6.05 ± 0.30 <sup>+</sup>   | -4.75 ± 0.15**** | Diet<br>Strain<br>Diet X Strain | 44.50<br>15.97<br>0.09  | <0.0001<br>0.0002<br>0.77 |
| (C16 + C18:1)/C2<br>(CPT-2) | -5.55 ± 0.10     | -4.34 ± 0.10**** | -5.61 ± 0.11                | -3.90 ± 0.14**** | Diet<br>Strain<br>Diet X Strain | 164.80<br>2.75<br>4.80  | <0.0001<br>0.10<br>0.03   |
| C2/C0                       | -1.03 ± 0.09     | -1.21 ± 0.07     | -0.32 ± 0.26 <sup>+</sup>   | -0.86 ± 0.21     | Diet<br>Strain<br>Diet X Strain | 3.99<br>8.62<br>0.95    | 0.05<br>0.005<br>0.34     |
| Total AC / C0               | -0.46 ± 0.07     | -0.11 ± 0.05     | 0.12 ± 0.23 <sup>+</sup>    | 0.29 ± 0.13      | Diet<br>Strain<br>Diet X Strain | 3.32<br>11.44<br>0.38   | 0.07<br>0.001<br>0.54     |
| Total AC-DC / Total AC      | -4.03 ± 0.07     | -3.21 ± 0.07**** | -4.54 ± 0.15 <sup>++</sup>  | -3.27 ± 0.11**** | Diet<br>Strain<br>Diet X Strain | 99.11<br>7.45<br>4.65   | <0.0001<br>0.009<br>0.04  |
| Total AC-OH / Total AC      | -4.94 ± 0.06     | -4.20 ± 0.07**** | -5.46 ± 0.12 <sup>+++</sup> | -4.35 ± 0.10**** | Diet<br>Strain<br>Diet X Strain | 100.32<br>13.90<br>4.39 | <0.0001<br>0.0005<br>0.04 |
| Total AC                    | 4.04 ± 0.07      | 3.24 ± 0.06****  | 4.68 ± 0.15 <sup>+++</sup>  | 3.31 ± 0.10****  | Diet<br>Strain<br>Diet X Strain | 108.64<br>11.60<br>7.23 | <0.0001<br>0.001<br>0.01  |
| Total AC-DC                 | 0.02 ± 0.04      | 0.03 ± 0.03      | 0.14 ± 0.05                 | 0.04 ± 0.04      | Diet<br>Strain<br>Diet X Strain | 0.99<br>2.67<br>1.65    | 0.32<br>0.11<br>0.21      |
| Total AC-OH                 | -0.89 ± 0.04     | -0.97 ± 0.03     | -0.79 ± 0.04                | -1.04 ± 0.04**** | Diet<br>Strain<br>Diet X Strain | 17.20<br>0.08<br>4.90   | 0.0001<br>0.78<br>0.03    |
|                             |                  |                  |                             |                  | Diet                            | 14.50                   | 0.0004                    |

|                                    |              |                |                            |                             |                      |       |         |
|------------------------------------|--------------|----------------|----------------------------|-----------------------------|----------------------|-------|---------|
| Branched-chain amino acids (BCAA)  | 8.56 ± 0.08  | 9.00 ± 0.19    | 9.23 ± 0.08 <sup>++</sup>  | 9.76 ± 0.15* <sup>@@@</sup> | <b>Strain</b>        | 30.83 | <0.0001 |
|                                    |              |                |                            |                             | <b>Diet X Strain</b> | 0.14  | 0.71    |
| Aromatic amino acids (AAA)         | 7.59 ± 0.08  | 7.47 ± 0.10    | 7.83 ± 0.07                | 7.83 ± 0.11                 | <b>Diet</b>          | 0.46  | 0.50    |
|                                    |              |                |                            |                             | <b>Strain</b>        | 10.57 | 0.002   |
|                                    |              |                |                            |                             | <b>Diet X Strain</b> | 0.52  | 0.47    |
| BCAA/AAA                           | 0.96 ± 0.05  | 1.53 ± 0.10*** | 1.40 ± 0.07 <sup>++</sup>  | 1.94 ± 0.13*** <sup>@</sup> | <b>Diet</b>          | 36.18 | <0.0001 |
|                                    |              |                |                            |                             | <b>Strain</b>        | 20.82 | <0.0001 |
|                                    |              |                |                            |                             | <b>Diet X Strain</b> | 0.04  | 0.84    |
| Gly/Glu                            | 0.42 ± 0.22  | 0.31 ± 0.17    | 0.58 ± 0.14                | -0.30 ± 0.19**              | <b>Diet</b>          | 7.61  | 0.008   |
|                                    |              |                |                            |                             | <b>Strain</b>        | 1.56  | 0.22    |
|                                    |              |                |                            |                             | <b>Diet X Strain</b> | 4.78  | 0.03    |
| Glu/His                            | 1.52 ± 0.24  | 1.06 ± 0.18    | 1.41 ± 0.14                | 1.41 ± 0.20                 | <b>Diet</b>          | 1.44  | 0.24    |
|                                    |              |                |                            |                             | <b>Strain</b>        | 0.41  | 0.53    |
|                                    |              |                |                            |                             | <b>Diet X Strain</b> | 1.39  | 0.24    |
| Gly/Ser                            | 1.15 ± 0.08  | 0.83 ± 0.11    | 0.84 ± 0.09                | 0.39 ± 0.10** <sup>@</sup>  | <b>Diet</b>          | 17.25 | 0.0001  |
|                                    |              |                |                            |                             | <b>Strain</b>        | 16.29 | 0.0002  |
|                                    |              |                |                            |                             | <b>Diet X Strain</b> | 0.48  | 0.49    |
| Tyr/Phe                            | -0.12 ± 0.09 | 0.10 ± 0.07    | -0.37 ± 0.08               | 0.005 ± 0.11*               | <b>Diet</b>          | 12.26 | 0.001   |
|                                    |              |                |                            |                             | <b>Strain</b>        | 4.14  | 0.05    |
|                                    |              |                |                            |                             | <b>Diet X Strain</b> | 0.77  | 0.38    |
| Arg/Cit                            | 0.79 ± 0.11  | 0.42 ± 0.13    | 1.09 ± 0.17                | 0.61 ± 0.12                 | <b>Diet</b>          | 9.96  | 0.003   |
|                                    |              |                |                            |                             | <b>Strain</b>        | 3.21  | 0.08    |
|                                    |              |                |                            |                             | <b>Diet X Strain</b> | 0.15  | 0.70    |
| Glucogenic amino acids             | 11.02 ± 0.06 | 10.96 ± 0.10   | 11.07 ± 0.06               | 11.10 ± 0.09                | <b>Diet</b>          | 0.02  | 0.89    |
|                                    |              |                |                            |                             | <b>Strain</b>        | 1.42  | 0.24    |
|                                    |              |                |                            |                             | <b>Diet X Strain</b> | 0.28  | 0.60    |
| Ketogenic amino acids              | 8.28 ± 0.09  | 8.72 ± 0.15    | 9.08 ± 0.11 <sup>+++</sup> | 9.11 ± 0.12                 | <b>Diet</b>          | 3.85  | 0.06    |
|                                    |              |                |                            |                             | <b>Strain</b>        | 24.95 | <0.0001 |
|                                    |              |                |                            |                             | <b>Diet X Strain</b> | 3.03  | 0.09    |
| Glucogenic + Ketogenic amino acids | 8.07 ± 0.08  | 8.11 ± 0.13    | 8.47 ± 0.06 <sup>+</sup>   | 8.68 ± 0.11 <sup>@@</sup>   | <b>Diet</b>          | 1.68  | 0.20    |
|                                    |              |                |                            |                             | <b>Strain</b>        | 23.81 | <0.0001 |
|                                    |              |                |                            |                             | <b>Diet X Strain</b> | 0.68  | 0.41    |
| Essential amino acids              | 9.87 ± 0.07  | 10.10 ± 0.14   | 10.30 ± 0.08 <sup>+</sup>  | 10.57 ± 0.11 <sup>@</sup>   | <b>Diet</b>          | 6.14  | 0.02    |
|                                    |              |                |                            |                             | <b>Strain</b>        | 19.16 | <0.0001 |

|                              |              |                               |                             |                              |                      |        |         |
|------------------------------|--------------|-------------------------------|-----------------------------|------------------------------|----------------------|--------|---------|
|                              |              |                               |                             |                              | <b>Diet X Strain</b> | 0.04   | 0.84    |
| Non-essential amino acids    | 10.74 ± 0.07 | 10.63 ± 0.10                  | 10.81 ± 0.06                | 10.67 ± 0.10                 | <b>Diet</b>          | 2.02   | 0.16    |
|                              |              |                               |                             |                              | <b>Strain</b>        | 0.39   | 0.54    |
|                              |              |                               |                             |                              | <b>Diet X Strain</b> | 0.03   | 0.86    |
| Total DMA                    | -3.47 ± 0.44 | -4.17 ± 0.45                  | -2.72 ± 0.33                | -3.66 ± 0.30                 | <b>Diet</b>          | 4.55   | 0.04    |
|                              |              |                               |                             |                              | <b>Strain</b>        | 2.70   | 0.11    |
|                              |              |                               |                             |                              | <b>Diet X Strain</b> | 0.10   | 0.76    |
| Spermidine/putrescine        | 1.35 ± 0.14  | 1.05 ± 0.10                   | 2.09 ± 0.16 <sup>++</sup>   | 1.95 ± 0.13 <sup>@@@</sup>   | <b>Diet</b>          | 2.64   | 0.11    |
|                              |              |                               |                             |                              | <b>Strain</b>        | 37.19  | <0.0001 |
|                              |              |                               |                             |                              | <b>Diet X Strain</b> | 0.35   | 0.56    |
| Kynurenin/tryptophan         | -5.90 ± 0.11 | -6.48 ± 0.12 <sup>**</sup>    | -5.74 ± 0.10                | -6.22 ± 0.12 <sup>*</sup>    | <b>Diet</b>          | 22.69  | <0.0001 |
|                              |              |                               |                             |                              | <b>Strain</b>        | 3.52   | 0.07    |
|                              |              |                               |                             |                              | <b>Diet X Strain</b> | 0.21   | 0.65    |
| Serotonin/tryptophan         | -3.01 ± 0.46 | -2.28 ± 0.31                  | -3.32 ± 0.19                | -2.99 ± 0.21                 | <b>Diet</b>          | 3.44   | 0.08    |
|                              |              |                               |                             |                              | <b>Strain</b>        | 3.19   | 0.09    |
|                              |              |                               |                             |                              | <b>Diet X Strain</b> | 0.51   | 0.48    |
| Serotonin/kynurenine         | 2.75 ± 0.04  | 4.22 ± 0.31                   | 2.47 ± 0.25                 | 3.18 ± 0.24                  | <b>Diet</b>          | 12.49  | 0.002   |
|                              |              |                               |                             |                              | <b>Strain</b>        | 4.61   | 0.04    |
|                              |              |                               |                             |                              | <b>Diet X Strain</b> | 1.49   | 0.24    |
| Met/Met-SO                   | 5.76 ± 0.48  | 4.97 ± 0.62                   | 5.01 ± 0.14                 | 4.31 ± 0.24                  | <b>Diet</b>          | 3.80   | 0.06    |
|                              |              |                               |                             |                              | <b>Strain</b>        | 3.33   | 0.08    |
|                              |              |                               |                             |                              | <b>Diet X Strain</b> | 0.01   | 0.91    |
| ADMA/Arg                     | -7.64 ± 0.14 | -7.72 ± 0.20                  | -7.94 ± 0.17                | -7.49 ± 0.24                 | <b>Diet</b>          | 0.92   | 0.34    |
|                              |              |                               |                             |                              | <b>Strain</b>        | 0.03   | 0.87    |
|                              |              |                               |                             |                              | <b>Diet X Strain</b> | 1.85   | 0.18    |
| Kynurenine/Alpha-amioadipate | -1.45 ± 0.17 | -2.63 ± 0.17 <sup>*****</sup> | -0.30 ± 0.09 <sup>+++</sup> | -0.97 ± 0.19 <sup>@@@@</sup> | <b>Diet</b>          | 25.57  | <0.0001 |
|                              |              |                               |                             |                              | <b>Strain</b>        | 59.61  | <0.0001 |
|                              |              |                               |                             |                              | <b>Diet X Strain</b> | 2.00   | 0.17    |
| Leucine/kynurenine           | 6.77 ± 0.11  | 7.99 ± 0.13 <sup>*****</sup>  | 7.00 ± 0.11                 | 8.13 ± 0.12 <sup>*****</sup> | <b>Diet</b>          | 102.68 | <0.0001 |
|                              |              |                               |                             |                              | <b>Strain</b>        | 2.57   | 0.12    |
|                              |              |                               |                             |                              | <b>Diet X Strain</b> | 0.14   | 0.71    |
| SFA aa                       | 4.28 ± 0.09  | 4.55 ± 0.06                   | 4.74 ± 0.12 <sup>++</sup>   | 4.54 ± 0.10                  | <b>Diet</b>          | 0.13   | 0.72    |
|                              |              |                               |                             |                              | <b>Strain</b>        | 5.68   | 0.02    |
|                              |              |                               |                             |                              | <b>Diet X Strain</b> | 6.22   | 0.02    |

|                      |              |                  |                             |                              |                                 |                         |                            |
|----------------------|--------------|------------------|-----------------------------|------------------------------|---------------------------------|-------------------------|----------------------------|
| PUFA aa              | 9.95 ± 0.07  | 10.72 ± 0.06**** | 10.28 ± 0.05 <sup>++</sup>  | 10.80 ± 0.06****             | Diet<br>Strain<br>Diet X Strain | 116.00<br>12.32<br>4.15 | <0.0001<br>0.001<br>0.05   |
| MUFA aa              | 7.22 ± 0.10  | 9.25 ± 0.08****  | 7.33 ± 0.10                 | 9.15 ± 0.14****              | Diet<br>Strain<br>Diet X Strain | 320.5<br>0.004<br>1.07  | <0.0001<br>0.95<br>0.31    |
| UFA aa               | 10.16 ± 0.07 | 11.17 ± 0.06**** | 10.46 ± 0.05 <sup>++</sup>  | 11.21 ± 0.08****             | Diet<br>Strain<br>Diet X Strain | 193.4<br>7.76<br>4.17   | <0.0001<br>0.008<br>0.05   |
| Total PC aa          | 10.18 ± 0.07 | 11.18 ± 0.06**** | 10.49 ± 0.05 <sup>++</sup>  | 11.23 ± 0.08****             | Diet<br>Strain<br>Diet X Strain | 191.90<br>8.02<br>4.35  | <0.0001<br>0.007<br>0.04   |
| SFA ae               | 2.20 ± 0.07  | 2.16 ± 0.06      | 2.25 ± 0.05                 | 2.25 ± 0.05                  | Diet<br>Strain<br>Diet X Strain | 0.09<br>1.35<br>0.08    | 0.76<br>0.25<br>0.78       |
| PUFA ae              | 5.24 ± 0.06  | 5.62 ± 0.04****  | 5.84 ± 0.06 <sup>++++</sup> | 5.99 ± 0.05 <sup>@@@</sup>   | Diet<br>Strain<br>Diet X Strain | 24.46<br>83.45<br>4.73  | <0.0001<br><0.0001<br>0.04 |
| MUFA ae              | 3.16 ± 0.06  | 4.09 ± 0.05****  | 3.39 ± 0.05 <sup>+</sup>    | 4.18 ± 0.05****              | Diet<br>Strain<br>Diet X Strain | 283.2<br>9.59<br>1.85   | <0.0001<br>0.003<br>0.18   |
| UFA ae               | 5.55 ± 0.06  | 6.05 ± 0.04****  | 6.09 ± 0.05 <sup>++++</sup> | 6.38 ± 0.06 <sup>**@@@</sup> | Diet<br>Strain<br>Diet X Strain | 56.40<br>67.18<br>4.08  | <0.0001<br><0.0001<br>0.05 |
| Total PC ae          | 5.68 ± 0.06  | 6.15 ± 0.04****  | 6.19 ± 0.05 <sup>++++</sup> | 6.46 ± 0.06 <sup>**@@@</sup> | Diet<br>Strain<br>Diet X Strain | 49.67<br>61.01<br>3.30  | <0.0001<br><0.0001<br>0.07 |
| SFA (PC ae + PC aa)  | 4.59 ± 0.07  | 4.81 ± 0.06      | 4.99 ± 0.10 <sup>++</sup>   | 4.81 ± 0.09                  | Diet<br>Strain<br>Diet X Strain | 0.06<br>5.79<br>5.42    | 0.81<br>0.02<br>0.02       |
| PUFA (PC ae + PC aa) | 10.01 ± 0.07 | 10.76 ± 0.06**** | 10.35 ± 0.05 <sup>+++</sup> | 10.85 ± 0.06****             | Diet<br>Strain<br>Diet X Strain | 112.6<br>13.70<br>4.28  | <0.0001<br>0.0006<br>0.04  |
| MUFA (PC ae + PC aa) |              |                  |                             |                              | Diet                            | 319.40                  | <0.0001                    |

|                                   |              |                  |                              |                                 |                      |        |         |
|-----------------------------------|--------------|------------------|------------------------------|---------------------------------|----------------------|--------|---------|
|                                   | 7.30 ± 0.10  | 9.29 ± 0.08****  | 7.43 ± 0.09                  | 9.19 ± 0.14****                 | <b>Strain</b>        | 0.02   | 0.89    |
|                                   |              |                  |                              |                                 | <b>Diet X Strain</b> | 1.10   | 0.30    |
| UFA (PC ae + PC aa)               | 10.21 ± 0.07 | 11.21 ± 0.06**** | 10.53 ± 0.05 <sup>++</sup>   | 11.26 ± 0.08****                | <b>Diet</b>          | 188.90 | <0.0001 |
|                                   |              |                  |                              |                                 | <b>Strain</b>        | 8.74   | 0.005   |
|                                   |              |                  |                              |                                 | <b>Diet X Strain</b> | 4.29   | 0.04    |
| Total LysoPC                      | 8.46 ± 0.07  | 8.97 ± 0.08****  | 8.42 ± 0.05                  | 8.86 ± 0.09***                  | <b>Diet</b>          | 42.68  | <0.0001 |
|                                   |              |                  |                              |                                 | <b>Strain</b>        | 1.21   | 0.28    |
|                                   |              |                  |                              |                                 | <b>Diet X Strain</b> | 0.24   | 0.63    |
| lysoPC a C16:1/<br>lysoPC a C16:0 | -4.62 ± 0.11 | -4.81 ± 0.09     | -5.63 ± 0.07 <sup>++++</sup> | -5.59 ± 0.07 <sup>@@@</sup>     | <b>Diet</b>          | 0.79   | 0.38    |
|                                   |              |                  |                              |                                 | <b>Strain</b>        | 104.1  | <0.0001 |
|                                   |              |                  |                              |                                 | <b>Diet X Strain</b> | 1.65   | 0.21    |
| lysoPC a C18:2/<br>lysoPC a C18:1 | 1.29 ± 0.06  | 0.43 ± 0.06****  | 1.69 ± 0.05 <sup>++</sup>    | 0.70 ± 0.13****                 | <b>Diet</b>          | 132.9  | <0.0001 |
|                                   |              |                  |                              |                                 | <b>Strain</b>        | 17.86  | 0.0001  |
|                                   |              |                  |                              |                                 | <b>Diet X Strain</b> | 0.72   | 0.40    |
| lysoPC a C20:4/<br>lysoPC a C20:3 | 2.06 ± 0.10  | 0.55 ± 0.08****  | 2.55 ± 0.08 <sup>++</sup>    | 1.09 ± 0.12**** <sup>@@</sup>   | <b>Diet</b>          | 243.6  | <0.0001 |
|                                   |              |                  |                              |                                 | <b>Strain</b>        | 29.88  | <0.0001 |
|                                   |              |                  |                              |                                 | <b>Diet X Strain</b> | 0.09   | 0.76    |
| Total SM                          | 6.12 ± 0.06  | 6.59 ± 0.06****  | 6.69 ± 0.05 <sup>++++</sup>  | 6.94 ± 0.04 <sup>@@@</sup>      | <b>Diet</b>          | 46.73  | <0.0001 |
|                                   |              |                  |                              |                                 | <b>Strain</b>        | 76.91  | <0.0001 |
|                                   |              |                  |                              |                                 | <b>Diet X Strain</b> | 4.68   | 0.04    |
| Total SM-non-OH                   | 5.89 ± 0.06  | 6.41 ± 0.06****  | 6.40 ± 0.05 <sup>++++</sup>  | 6.72 ± 0.04**** <sup>@@</sup>   | <b>Diet</b>          | 63.55  | <0.0001 |
|                                   |              |                  |                              |                                 | <b>Strain</b>        | 59.02  | <0.0001 |
|                                   |              |                  |                              |                                 | <b>Diet X Strain</b> | 3.76   | 0.06    |
| Total SM-OH                       | 3.35 ± 0.06  | 3.45 ± 0.05      | 4.23 ± 0.06 <sup>++++</sup>  | 4.08 ± 0.05 <sup>@@@</sup>      | <b>Diet</b>          | 0.18   | 0.67    |
|                                   |              |                  |                              |                                 | <b>Strain</b>        | 179.10 | <0.0001 |
|                                   |              |                  |                              |                                 | <b>Diet X Strain</b> | 4.93   | 0.03    |
| Total SM-OH /<br>Total SM-non-OH  | -2.53 ± 0.03 | -2.96 ± 0.03**** | -2.16 ± 0.04 <sup>++++</sup> | -2.64 ± 0.03**** <sup>@@@</sup> | <b>Diet</b>          | 172.0  | <0.0001 |
|                                   |              |                  |                              |                                 | <b>Strain</b>        | 102.6  | <0.0001 |
|                                   |              |                  |                              |                                 | <b>Diet X Strain</b> | 0.42   | 0.52    |

**Supplementary Table S2. Significantly different metabolites in B16 and 129Sv with standard and HFD.** The Bonferroni correction was applied ( $p < 0.00027$ ) to compare two mouse strains.

| Standard food        |                 |                          | High fat diet  |                 |                          |
|----------------------|-----------------|--------------------------|----------------|-----------------|--------------------------|
| Metabolite           | <i>t</i> -value | adjusted <i>p</i> -value | Metabolite     | <i>t</i> -value | adjusted <i>p</i> -value |
| <b>Higher in B16</b> |                 |                          |                |                 |                          |
| LysoPC a C16:1       | 6.20            | 0.000003                 | LysoPC a C16:1 | 5.34            | 0.00002                  |
| LysoPC a C20:3       | 4.71            | 0.0001                   | LysoPC a C20:3 | 4.45            | 0.0002                   |
| Carnosine            | 8.26            | <0.000001                | Alpha-AAA      | 6.24            | 0.00002                  |
|                      |                 |                          | Carnosine      | 5.98            | 0.000005                 |
|                      |                 |                          | Putrescine     | 5.59            | 0.000005                 |
|                      |                 |                          | t4-OH-Pro      | 8.38            | <0.000001                |
|                      |                 |                          | PC aa C32:1    | 4.68            | 0.0001                   |
|                      |                 |                          | PC aa C34:3    | 5.26            | 0.00003                  |
|                      |                 |                          | SM C20:2       | 5.48            | 0.00002                  |



| Higher in 129Sv |       |           |               |        |           |
|-----------------|-------|-----------|---------------|--------|-----------|
| C3              | -4.34 | 0.0002    | PC aa C30:2   | -4.90  | 0.00007   |
| LysoPC a C17:0  | -6.77 | 0.000001  | PC aa C40:5   | -4.60  | 0.0001    |
| LysoPC a C24:0  | -5.27 | 0.00002   | PC ae C32:1   | -4.44  | 0.0002    |
| Ile             | -6.19 | 0.000003  | PC ae C34:0   | -4.43  | 0.0002    |
| Leu             | -5.66 | 0.000009  | PC ae C34:2   | -7.71  | <0.000001 |
| Lys             | -5.19 | 0.00003   | PC ae C34:3   | -5.85  | 0.000007  |
| Orn             | -4.52 | 0.0002    | PC ae C36:2   | -6.32  | 0.000002  |
| Ser             | -4.83 | 0.00007   | PC ae C36:5   | -5.96  | 0.000005  |
| Val             | -5.72 | 0.000008  | PC ae C38:2   | -6.16  | 0.000003  |
| PC aa C30:2     | -5.22 | 0.00003   | PC ae C38:6   | -7.29  | <0.000001 |
| PC aa C36:0     | -5.15 | 0.00003   | PC ae C40:6   | -6.84  | 0.000001  |
| PC aa C36:2     | -6.47 | 0.000001  | SM (OH) C14:1 | -10.33 | <0.000001 |
| PC aa C40:2     | -4.88 | 0.00006   | SM (OH) C16:1 | -9.73  | <0.000001 |
| PC aa C40:5     | -4.36 | 0.0002    | SM (OH) C22:1 | -6.49  | 0.000002  |
| PC aa C40:6     | -5.05 | 0.00004   | SM (OH) C22:2 | -8.34  | <0.000001 |
| PC ae C30:2     | -7.32 | <0.000001 | SM C16:0      | -5.47  | 0.00002   |
| PC ae C32:1     | -6.05 | 0.000004  | SM C16:1      | -7.57  | <0.000001 |

|             |        |           |                       |       |         |
|-------------|--------|-----------|-----------------------|-------|---------|
| PC ae C32:2 | -4.67  | 0.0001    | CPT-1                 | -4.52 | 0.0002  |
| PC ae C34:0 | -6.63  | 0.000001  | Spermidine/Putrescine | -5.53 | 0.00002 |
| PC ae C34:2 | -4.67  | 0.0001    | Kynurenine/Alpha-AAA  | -5.76 | 0.00004 |
| PC ae C34:3 | -7.42  | <0.000001 |                       |       |         |
| PC ae C36:1 | -5.63  | 0.00001   |                       |       |         |
| PC ae C36:2 | -10.54 | <0.000001 |                       |       |         |
| PC ae C36:5 | 4.57   | 0.0001    |                       |       |         |
| PC ae C38:2 | -11.44 | <0.000001 |                       |       |         |
| PC ae C38:3 | -6.42  | 0.000001  |                       |       |         |
| PC ae C38:4 | -7.38  | <0.000001 |                       |       |         |
| PC ae C38:6 | 6.94   | <0.000001 |                       |       |         |
| PC ae C40:2 | 7.05   | <0.000001 |                       |       |         |
| PC ae C40:3 | -4.53  | 0.0001    |                       |       |         |
| PC ae C40:4 | -6.26  | 0.000002  |                       |       |         |
| PC ae C40:5 | -4.76  | 0.00008   |                       |       |         |

|                          |        |           |  |  |  |
|--------------------------|--------|-----------|--|--|--|
| PC ae C40:6              | -8.66  | <0.000001 |  |  |  |
| PC ae C42:5              | -6.10  | 0.000003  |  |  |  |
| SM (OH) C14:1            | -9.22  | <0.000001 |  |  |  |
| SM (OH) C16:1            | -6.11  | 0.000003  |  |  |  |
| SM (OH) C22:1            | -9.31  | <0.000001 |  |  |  |
| SM (OH) C22:2            | -10.79 | <0.000001 |  |  |  |
| SM C16:0                 | -6.94  | <0.000001 |  |  |  |
| SM C16:1                 | -8.22  | <0.000001 |  |  |  |
| SM C24:0                 | -5.74  | 0.000008  |  |  |  |
| SM C24:1                 | -6.53  | 0.000001  |  |  |  |
| BCAA                     | -6.14  | 0.000003  |  |  |  |
| BCAA/AAA                 | 5.14   | 0.00003   |  |  |  |
| Ketogenic amino acids    | -5.61  | 0.00001   |  |  |  |
| Kynurenine/<br>Alpha-AAA | -5.04  | 0.00009   |  |  |  |

**Supplementary Figure S1.** Locomotor activity of Bl6 and 129Sv mice in the first three hours of 24 h Phenotyper trial (Log2 values, data expressed as mean  $\pm$  SEM). Total distance traveled in the 1st hour of day 1 (A) and week 9 (G), 2nd hour of day 1 (B) and week 9 (H) and 3rd hour of day 1 (C) and week 9 (I). Time spent in the center zone in the 1st hour of day 1 (D) and week 9 (J), 2nd hour of day 1 (E) and week 9 (F) and 3rd hour of day 1 (K) and week 9 (L). Two-way ANOVA (Bonferroni post hoc test): \*\* $p \leq 0.01$  (diet effect), + $p \leq 0.05$ , ++ $p \leq 0.01$ , +++ $p \leq 0.001$ , ++++ $p \leq 0.0001$  (strain effect).

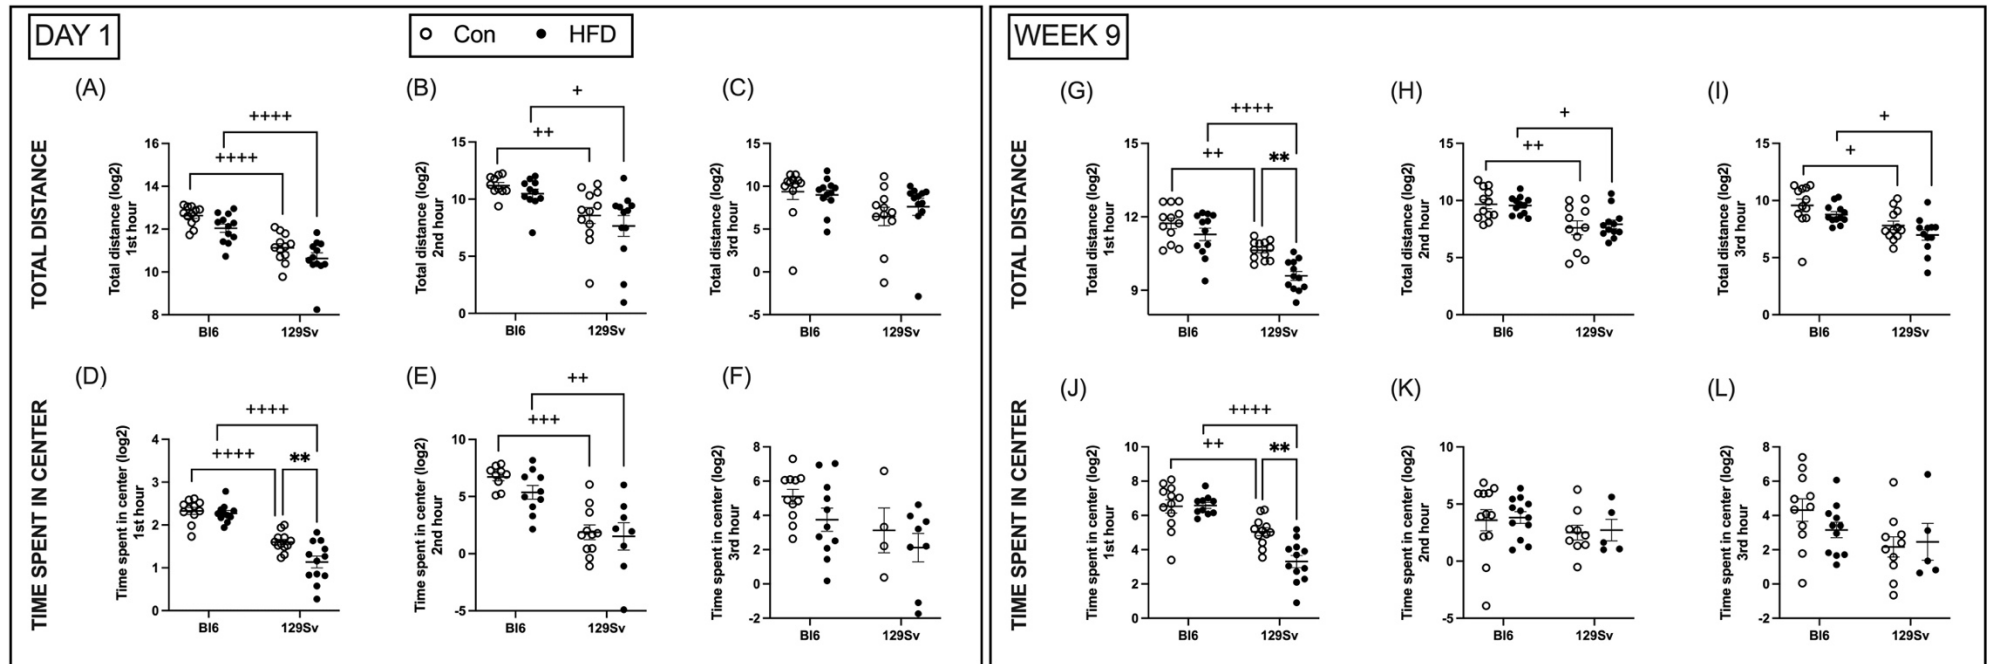

Supplement: s1 [file s1]
